# Supplementary material for: Multivalent Histone and DNA Engagement by a PHD/BRD/PWWP Triple Reader Cassette Recruits ZMYND8 to K14ac-Rich Chromatin
Source: PubMed Central journal article supplement (PMC5177622; doi:10.1016/j.celrep.2016.11.014), 2016-12-06
Supplement: mmc3.pdf [file mmc3.pdf]

| Histone             | Peptide Length | Array Position | Kac Mark Combinations | Sequence                                       |
|---------------------|----------------|----------------|-----------------------|------------------------------------------------|
| polyHis CTRL        |                | A1             | HHHHHHHH              |                                                |
| polyHis CTRL        |                | A2             | HHHHHHHH              |                                                |
|                     |                | A3             | Blank                 |                                                |
| <b>H2A (Q6F113)</b> | 1-20           | A4             | CONTROL               | S G R G K Q G G K A R A K A K S R S S R        |
|                     |                | A5             | pS1                   | pS G R G K Q G G K A R A K A K S R S S R       |
|                     |                | A6             | K5me                  | S G R G Kme Q G G K A R A K A K S R S S R      |
|                     |                | A7             | K5me2                 | S G R G Kme2 Q G G K A R A K A K S R S S R     |
|                     |                | A8             | K5me3                 | S G R G Kme3 Q G G K A R A K A K S R S S R     |
|                     |                | A9             | K5ac                  | S G R G Kac Q G G K A R A K A K S R S S R      |
|                     |                | A10            | K9me                  | S G R G K Q G G Kme A R A K A K S R S S R      |
|                     |                | A11            | K9me2                 | S G R G K Q G G Kme2 A R A K A K S R S S R     |
|                     |                | A12            | K9me3                 | S G R G K Q G G Kme3 A R A K A K S R S S R     |
|                     |                | A13            | K9ac                  | S G R G K Q G G Kac A R A K A K S R S S R      |
|                     |                | A14            | K13me                 | S G R G K Q G G K A R A Kme A K S R S S R      |
|                     |                | A15            | K13me2                | S G R G K Q G G K A R A Kme2 A K S R S S R     |
|                     |                | A16            | K13me3                | S G R G K Q G G K1 A R A Kme3 A K S R S S R    |
|                     |                | A17            | K13ac                 | S G R G K Q G G K A R A Kac A K S R S S R      |
|                     |                | A18            | pS1/K5me              | pS G R G Kme Q G G K A R A K A K S R S S R     |
|                     |                | A19            | pS1/K5me2             | pS G R G Kme2 Q G G K A R A K A K S R S S R    |
|                     |                | A20            | pS1/K5me3             | pS G R G Kme3 Q G G K A R A K A K S R S S R    |
|                     |                | A21            | pS1/K5ac              | pS G R G Kac Q G G K A R A K A K S R S S R     |
|                     |                | A22            | K5me/K9me             | S G R G Kme Q G G Kme A R A K A K S R S S R    |
|                     |                | A23            | K5me/K9me2            | S G R G Kme Q G G Kme2 A R A K A K S R S S R   |
|                     |                | A24            | K5me/K9me3            | S G R G Kme Q G G Kme3 A R A K A K S R S S R   |
|                     |                | A25            | K5me/K9ac             | S G R G Kme Q G G Kac A R A K A K S R S S R    |
|                     |                | A26            | K5me2/K9me            | S G R G Kme2 Q G G Kme A R A K A K S R S S R   |
|                     |                | A27            | K5me2/K9me2           | S G R G Kme2 Q G G Kme2 A R A K A K S R S S R  |
|                     |                | A28            | K5me2/K9me3           | S G R G Kme2 Q G G Kme3 A R A K A K S R S S R  |
|                     |                | A29            | K5me2/K9ac            | S G R G Kme2 Q G G Kac A R A K A K S R S S R   |
|                     |                | A30            | K5me3/K9me            | S G R G Kme3 Q G G Kme A R A K A K S R S S R   |
|                     |                | A31            | K5me3/K9me2           | S G R G Kme3 Q G G Kme2 A R A K A K S R S S R  |
|                     |                | A32            | K5me3/K9me3           | S G R G Kme3 Q G G Kme3 A R A K A K S R S S R  |
|                     |                | A33            | K5me3/K9ac            | S G R G Kme3 Q G G Kac A R A K A K S R S S R   |
|                     |                | A34            | K5ac/K9me             | S G R G Kac Q G G Kme A R A K A K S R S S R    |
|                     |                | A35            | K5ac/K9me2            | S G R G Kac Q G G Kme2 A R A K A K S R S S R   |
|                     |                | A36            | K5ac/K9me3            | S G R G Kac Q G G Kme3 A R A K A K S R S S R   |
|                     |                | A37            | K5ac/K9ac             | S G R G Kac Q G G Kac A R A K A K S R S S R    |
|                     |                | B1             | K9me/K13me            | S G R G K Q G G Kme A R A Kme A K S R S S R    |
|                     |                | B2             | K9me/K13me2           | S G R G K Q G G Kme A R A Kme2 A K S R S S R   |
|                     |                | B3             | K9me/K13me3           | S G R G K Q G G Kme A R A Kme3 A K S R S S R   |
|                     |                | B4             | K9me/K13ac            | S G R G K Q G G Kme A R A Kac A K S R S S R    |
|                     |                | B5             | K9me2/K13me           | S G R G K Q G G Kme2 A R A Kme A K S R S S R   |
|                     |                | B6             | K9me2/K13me2          | S G R G K Q G G Kme2 A R A Kme2 A K S R S S R  |
|                     |                | B7             | K9me2/K13me3          | S G R G K Q G G Kme2 A R A Kme3 A K S R S S R  |
|                     |                | B8             | K9me2/K13ac           | S G R G K Q G G Kme2 A R A Kac A K S R S S R   |
|                     |                | B9             | K9me3/K13me           | S G R G K Q G G Kme3 A R A Kme A K S R S S R   |
|                     |                | B10            | K9me3/K13me2          | S G R G K Q G G Kme3 A R A Kme2 A K S R S S R  |
|                     |                | B11            | K9me3/K13me3          | S G R G K Q G G Kme3 A R A Kme3 A K S R S S R  |
|                     |                | B12            | K9me3/K13ac           | S G R G K Q G G Kme3 A R A Kac A K S R S S R   |
|                     |                | B13            | K9ac/K13me            | S G R G K Q G G Kac A R A Kme A K S R S S R    |
|                     |                | B14            | K9ac/K13me2           | S G R G K Q G G Kac A R A Kme2 A K S R S S R   |
|                     |                | B15            | K9ac/K13me3           | S G R G K Q G G Kac A R A Kme3 A K S R S S R   |
|                     |                | B16            | K9ac/K13ac            | S G R G K Q G G Kac A R A Kac A K S R S S R    |
|                     |                | B17            | Blank                 |                                                |
|                     | 6-25           | B18            | CONTROL               | Q G G K A R A K A K S R S S R A G L Q F        |
|                     |                | B19            | K13me                 | Q G G K A R A Kme A K S R S S R A G L Q F      |
|                     |                | B20            | K13me2                | Q G G K A R A Kme2 A K S R S S R A G L Q F     |
|                     |                | B21            | K13me3                | Q G G K A R A Kme3 A K S R S S R A G L Q F     |
|                     |                | B22            | K13ac                 | Q G G K A R A Kac A K S R S S R A G L Q F      |
|                     |                | B23            | K15me                 | Q G G K A R A K A Kme S R S S R A G L Q F      |
|                     |                | B24            | K15me2                | Q G G K A R A K A Kme2 S R S S R A G L Q F     |
|                     |                | B25            | K15me3                | Q G G K A R A K A Kme3 S R S S R A G L Q F     |
|                     |                | B26            | K15ac                 | Q G G K A R A K A Kac S R S S R A G L Q F      |
|                     |                | B27            | pS16                  | Q G G K A R A K A K pS R S S R A G L Q F       |
|                     |                | B28            | K13me/K15me           | Q G G K A R A Kme A Kme S R S S R A G L Q F    |
|                     |                | B29            | K13me/K15me2          | Q G G K A R A Kme A Kme2 S R S S R A G L Q F   |
|                     |                | B30            | K13me/K15me3          | Q G G K A R A Kme A Kme3 S R S S R A G L Q F   |
|                     |                | B31            | K13me/K15ac           | Q G G K A R A Kme A Kac S R S S R A G L Q F    |
|                     |                | B32            | K13me2/K15me          | Q G G K A R A Kme2 A Kme S R S S R A G L Q F   |
|                     |                | B33            | K13me2/K15me2         | Q G G K A R A Kme2 A Kme2 S R S S R A G L Q F  |
|                     |                | B34            | K13me2/K15me3         | Q G G K A R A Kme2 A Kme3 S R S S R A G L Q F  |
|                     |                | B35            | K13me2/K15ac          | Q G G K A R A Kme2 A Kac S R S S R A G L Q F   |
|                     |                | B36            | K13me3/K15me          | Q G G K A R A Kme3 A Kme S R S S R A G L Q F   |
|                     |                | B37            | K13me3/K15me2         | Q G G K A R A Kme3 A Kme2 S R S S R A G L Q F  |
|                     |                | C1             | K13me3/K15me3         | Q G G K A R A Kme3 A Kme3 S R S S R A G L Q F  |
|                     |                | C2             | K13me3/K15ac          | Q G G K A R A Kme3 A Kac S R S S R A G L Q F   |
|                     |                | C3             | K13ac/K15me           | Q G G K A R A Kac A Kme S R S S R A G L Q F    |
|                     |                | C4             | K13ac/K15me2          | Q G G K A R A Kac A Kme2 S R S S R A G L Q F   |
|                     |                | C5             | K13ac/K15me3          | Q G G K A R A Kac A Kme3 S R S S R A G L Q F   |
|                     |                | C6             | K13ac/K15ac           | Q G G K A R A Kac A Kac S R S S R A G L Q F    |
|                     |                | C7             | K13me/pS16            | Q G G K A R A Kme A K pS R S S R A G L Q F     |
|                     |                | C8             | K13me2/pS16           | Q G G K A R A Kme2 A K pS R S S R A G L Q F    |
|                     |                | C9             | K13me3/pS16           | Q G G K A R A Kme3 A K pS R S S R A G L Q F    |
|                     |                | C10            | K13ac/pS16            | Q G G K A R A Kac A K pS R S S R A G L Q F     |
|                     |                | C11            | K15me/pS16            | Q G G K A R A K A Kme pS R S S R A G L Q F     |
|                     |                | C12            | K15me2/pS16           | Q G G K A R A K A Kme2 pS R S S R A G L Q F    |
|                     |                | C13            | K15me3/pS16           | Q G G K A R A K A Kme3 pS R S S R A G L Q F    |
|                     |                | C14            | K15ac/pS16            | Q G G K A R A K A Kac pS R S S R A G L Q F     |
|                     |                | C15            | K13me/K15me/pS16      | Q G G K A R A Kme A Kme pS R S S R A G L Q F   |
|                     |                | C16            | K13me/K15me2/pS16     | Q G G K A R A Kme A Kme2 pS R S S R A G L Q F  |
|                     |                | C17            | K13me/K15me3/pS16     | Q G G K A R A Kme A Kme3 pS R S S R A G L Q F  |
|                     |                | C18            | K13me/K15ac/pS16      | Q G G K A R A Kme A Kac pS R S S R A G L Q F   |
|                     |                | C19            | K13me2/K15me/pS16     | Q G G K A R A Kme2 A Kme pS R S S R A G L Q F  |
|                     |                | C20            | K13me2/K15me2/pS16    | Q G G K A R A Kme2 A Kme2 pS R S S R A G L Q F |
|                     |                | C21            | K13me2/K15me3/pS16    | Q G G K A R A Kme2 A Kme3 pS R S S R A G L Q F |
|                     |                | C22            | K13me2/K15ac/pS16     | Q G G K A R A Kme2 A Kac pS R S S R A G L Q F  |
|                     |                | C23            | K13me3/K15me/pS16     | Q G G K A R A Kme3 A Kme pS R S S R A G L Q F  |
|                     |                | C24            | K13me3/K15me2/pS16    | Q G G K A R A Kme3 A Kme2 pS R S S R A G L Q F |
|                     |                | C25            | K13me3/K15me3/pS16    | Q G G K A R A Kme3 A Kme3 pS R S S R A G L Q F |
|                     |                | C26            | K13me3/K15ac/pS16     | Q G G K A R A Kme3 A Kac pS R S S R A G L Q F  |
|                     |                | C27            | K13ac/K15me/pS16      | Q G G K A R A Kac A Kme pS R S S R A G L Q F   |

|     |                    |   |   |   |   |      |    |   |      |    |      |    |   |    |    |   |   |   |   |   |   |   |
|-----|--------------------|---|---|---|---|------|----|---|------|----|------|----|---|----|----|---|---|---|---|---|---|---|
| C28 | K13ac/K15me2/pS16  | Q | G | G | K | A    | R  | A | Kac  | A  | Kme2 | pS | R | S  | S  | R | A | G | L | Q | F |   |
| C29 | K13ac/K15me3/pS16  | Q | G | G | K | A    | R  | A | Kac  | A  | Kme3 | pS | R | S  | S  | R | A | G | L | Q | F |   |
| C30 | K13ac/K15ac/pS16   | Q | G | G | K | A    | R  | A | Kac  | A  | Kac  | pS | R | S  | S  | R | A | G | L | Q | F |   |
| C31 | pS18               | Q | G | G | K | A    | R  | A | K    | A  | K    | S  | R | pS | S  | R | A | G | L | Q | F |   |
| C32 | K13me/pS18         | Q | G | G | K | A    | R  | A | Kme  | A  | K    | S  | R | pS | S  | R | A | G | L | Q | F |   |
| C33 | K13me2/pS18        | Q | G | G | K | A    | R  | A | Kme2 | A  | K    | S  | R | pS | S  | R | A | G | L | Q | F |   |
| C34 | K13me3/pS18        | Q | G | G | K | A    | R  | A | Kme3 | A  | K    | S  | R | pS | S  | R | A | G | L | Q | F |   |
| C35 | K13ac/pS18         | Q | G | G | K | A    | R  | A | Kac  | A  | K    | S  | R | pS | S  | R | A | G | L | Q | F |   |
| C36 | K15me/pS18         | Q | G | G | K | A    | R  | A | K    | A  | Kme  | S  | R | pS | S  | R | A | G | L | Q | F |   |
| C37 | K15me2/pS18        | Q | G | G | K | A    | R  | A | K    | A  | Kme2 | S  | R | pS | S  | R | A | G | L | Q | F |   |
| D1  | K15me3/pS18        | Q | G | G | K | A    | R  | A | K    | A  | Kme3 | S  | R | pS | S  | R | A | G | L | Q | F |   |
| D2  | K15ac/pS18         | Q | G | G | K | A    | R  | A | K    | A  | Kac  | S  | R | pS | S  | R | A | G | L | Q | F |   |
| D3  | K13me/K15me/pS18   | Q | G | G | K | A    | R  | A | Kme  | A  | Kme  | S  | R | pS | S  | R | A | G | L | Q | F |   |
| D4  | K13me/K15me2/pS18  | Q | G | G | K | A    | R  | A | Kme  | A  | Kme2 | S  | R | pS | S  | R | A | G | L | Q | F |   |
| D5  | K13me/K15me3/pS18  | Q | G | G | K | A    | R  | A | Kme  | A  | Kme3 | S  | R | pS | S  | R | A | G | L | Q | F |   |
| D6  | K13me/K15ac/pS18   | Q | G | G | K | A    | R  | A | Kme  | A  | Kac  | S  | R | pS | S  | R | A | G | L | Q | F |   |
| D7  | K13me2/K15me/pS18  | Q | G | G | K | A    | R  | A | Kme2 | A  | Kme  | S  | R | pS | S  | R | A | G | L | Q | F |   |
| D8  | K13me2/K15me2/pS18 | Q | G | G | K | A    | R  | A | Kme2 | A  | Kme2 | S  | R | pS | S  | R | A | G | L | Q | F |   |
| D9  | K13me2/K15me3/pS18 | Q | G | G | K | A    | R  | A | Kme2 | A  | Kme3 | S  | R | pS | S  | R | A | G | L | Q | F |   |
| D10 | K13me2/K15ac/pS18  | Q | G | G | K | A    | R  | A | Kme2 | A  | Kac  | S  | R | pS | S  | R | A | G | L | Q | F |   |
| D11 | K13me3/K15me/pS18  | Q | G | G | K | A    | R  | A | Kme3 | A  | Kme  | S  | R | pS | S  | R | A | G | L | Q | F |   |
| D12 | K13me3/K15me2/pS18 | Q | G | G | K | A    | R  | A | Kme3 | A  | Kme2 | S  | R | pS | S  | R | A | G | L | Q | F |   |
| D13 | K13me3/K15me3/pS18 | Q | G | G | K | A    | R  | A | Kme3 | A  | Kme3 | S  | R | pS | S  | R | A | G | L | Q | F |   |
| D14 | K13me3/K15ac/pS18  | Q | G | G | K | A    | R  | A | Kme3 | A  | Kac  | S  | R | pS | S  | R | A | G | L | Q | F |   |
| D15 | K13ac/K15me/pS18   | Q | G | G | K | A    | R  | A | Kac  | A  | Kme  | S  | R | pS | S  | R | A | G | L | Q | F |   |
| D16 | K13ac/K15me2/pS18  | Q | G | G | K | A    | R  | A | Kac  | A  | Kme2 | S  | R | pS | S  | R | A | G | L | Q | F |   |
| D17 | K13ac/K15me3/pS18  | Q | G | G | K | A    | R  | A | Kac  | A  | Kme3 | S  | R | pS | S  | R | A | G | L | Q | F |   |
| D18 | K13ac/K15ac/pS18   | Q | G | G | K | A    | R  | A | Kac  | A  | Kac  | S  | R | pS | S  | R | A | G | L | Q | F |   |
| D19 | pS19               | Q | G | G | K | A    | R  | A | K    | A  | K    | S  | R | S  | pS | R | A | G | L | Q | F |   |
| D20 | K13me/K15me/pS19   | Q | G | G | K | A    | R  | A | Kme  | A  | Kme  | S  | R | S  | pS | R | A | G | L | Q | F |   |
| D21 | K13me/K15me2/pS19  | Q | G | G | K | A    | R  | A | Kme  | A  | Kme2 | S  | R | S  | pS | R | A | G | L | Q | F |   |
| D22 | K13me/K15me3/pS19  | Q | G | G | K | A    | R  | A | Kme  | A  | Kme3 | S  | R | S  | pS | R | A | G | L | Q | F |   |
| D23 | K13me/K15ac/pS19   | Q | G | G | K | A    | R  | A | Kme  | A  | Kac  | S  | R | S  | pS | R | A | G | L | Q | F |   |
| D24 | K13me2/K15me/pS19  | Q | G | G | K | A    | R  | A | Kme2 | A  | Kme  | S  | R | S  | pS | R | A | G | L | Q | F |   |
| D25 | K13me2/K15me2/pS19 | Q | G | G | K | A    | R  | A | Kme2 | A  | Kme2 | S  | R | S  | pS | R | A | G | L | Q | F |   |
| D26 | K13me2/K15me3/pS19 | Q | G | G | K | A    | R  | A | Kme2 | A  | Kme3 | S  | R | S  | pS | R | A | G | L | Q | F |   |
| D27 | K13me2/K15ac/pS19  | Q | G | G | K | A    | R  | A | Kme2 | A  | Kac  | S  | R | S  | pS | R | A | G | L | Q | F |   |
| D28 | K13me3/K15me/pS19  | Q | G | G | K | A    | R  | A | Kme3 | A  | Kme  | S  | R | S  | pS | R | A | G | L | Q | F |   |
| D29 | K13me3/K15me2/pS19 | Q | G | G | K | A    | R  | A | Kme3 | A  | Kme2 | S  | R | S  | pS | R | A | G | L | Q | F |   |
| D30 | K13me3/K15me3/pS19 | Q | G | G | K | A    | R  | A | Kme3 | A  | Kme3 | S  | R | S  | pS | R | A | G | L | Q | F |   |
| D31 | K13me3/K15ac/pS19  | Q | G | G | K | A    | R  | A | Kme3 | A  | Kac  | S  | R | S  | pS | R | A | G | L | Q | F |   |
| D32 | K13ac/K15me/pS19   | Q | G | G | K | A    | R  | A | Kac  | A  | Kme  | S  | R | S  | pS | R | A | G | L | Q | F |   |
| D33 | K13ac/K15me2/pS19  | Q | G | G | K | A    | R  | A | Kac  | A  | Kme2 | S  | R | S  | pS | R | A | G | L | Q | F |   |
| D34 | K13ac/K15me3/pS19  | Q | G | G | K | A    | R  | A | Kac  | A  | Kme3 | S  | R | S  | pS | R | A | G | L | Q | F |   |
| D35 | K13ac/K15ac/pS19   | Q | G | G | K | A    | R  | A | Kac  | A  | Kac  | S  | R | S  | pS | R | A | G | L | Q | F |   |
| D36 | Blank              |   |   |   |   |      |    |   |      |    |      |    |   |    |    |   |   |   |   |   |   |   |
| D37 | CONTROL            | R | A | K | A | K    | S  | R | S    | S  | R    | A  | G | L  | Q  | F | P | V | G | R | V |   |
| E1  | K15me              | R | A | K | A | Kme  | S  | R | S    | S  | R    | A  | G | L  | Q  | F | P | V | G | R | V |   |
| E2  | K15me2             | R | A | K | A | Kme2 | S  | R | S    | S  | R    | A  | G | L  | Q  | F | P | V | G | R | V |   |
| E3  | K15me3             | R | A | K | A | Kme3 | S  | R | S    | S  | R    | A  | G | L  | Q  | F | P | V | G | R | V |   |
| E4  | K15ac              | R | A | K | A | Kac  | S  | R | S    | S  | R    | A  | G | L  | Q  | F | P | V | G | R | V |   |
| E5  | pS16               | R | A | K | A | K    | pS | R | S    | S  | R    | A  | G | L  | Q  | F | P | V | G | R | V |   |
| E6  | pS18               | R | A | K | A | K    | S  | R | pS   | S  | R    | A  | G | L  | Q  | F | P | V | G | R | V |   |
| E7  | pS19               | R | A | K | A | K    | S  | R | S    | pS | S    | R  | A | G  | L  | Q | F | P | V | G | R | V |
| E8  | K15me/pS16         | R | A | K | A | Kme  | pS | R | S    | S  | R    | A  | G | L  | Q  | F | P | V | G | R | V |   |
| E9  | K15me2/pS16        | R | A | K | A | Kme2 | pS | R | S    | S  | R    | A  | G | L  | Q  | F | P | V | G | R | V |   |
| E10 | K15me3/pS16        | R | A | K | A | Kme3 | pS | R | S    | S  | R    | A  | G | L  | Q  | F | P | V | G | R | V |   |
| E11 | K15ac/pS16         | R | A | K | A | Kac  | pS | R | S    | S  | R    | A  | G | L  | Q  | F | P | V | G | R | V |   |
| E12 | K15me/pS18         | R | A | K | A | Kme  | S  | R | pS   | S  | R    | A  | G | L  | Q  | F | P | V | G | R | V |   |
| E13 | K15me2/pS18        | R | A | K | A | Kme2 | S  | R | pS   | S  | R    | A  | G | L  | Q  | F | P | V | G | R | V |   |
| E14 | K15me3/pS18        | R | A | K | A | Kme3 | S  | R | pS   | S  | R    | A  | G | L  | Q  | F | P | V | G | R | V |   |
| E15 | K15ac/pS18         | R | A | K | A | Kac  | S  | R | pS   | S  | R    | A  | G | L  | Q  | F | P | V | G | R | V |   |
| E16 | K15me/pS19         | R | A | K | A | Kme  | S  | R | S    | pS | R    | A  | G | L  | Q  | F | P | V | G | R | V |   |
| E17 | K15me2/pS19        | R | A | K | A | Kme2 | S  | R | S    | pS | R    | A  | G | L  | Q  | F | P | V | G | R | V |   |
| E18 | K15me3/pS19        | R | A | K | A | Kme3 | S  | R | S    | pS | R    | A  | G | L  | Q  | F | P | V | G | R | V |   |
| E19 | K15ac/pS19         | R | A | K | A | Kac  | S  | R | S    | pS | R    | A  | G | L  | Q  | F | P | V | G | R | V |   |
| E20 | Blank              |   |   |   |   |      |    |   |      |    |      |    |   |    |    |   |   |   |   |   |   |   |
| E21 | CONTROL            | V | G | R | V | H    | R  | L | L    | R  | K    | G  | N | Y  | A  | E | R | V | G | A | G |   |
| E22 | K36me              | V | G | R | V | H    | R  | L | L    | R  | Kme  | G  | N | Y  | A  | E | R | V | G | A | G |   |
| E23 | K36me2             | V | G | R | V | H    | R  | L | L    | R  | Kme2 | G  | N | Y  | A  | E | R | V | G | A | G |   |
| E24 | K36me3             | V | G | R | V | H    | R  | L | L    | R  | Kme3 | G  | N | Y  | A  | E | R | V | G | A | G |   |
| E25 | K36ac              | V | G | R | V | H    | R  | L | L    | R  | Kac  | G  | N | Y  | A  | E | R | V | G | A | G |   |

11-30

27-46

| Histone        | Peptide Length | Array Poition | Kac Mark Combinations | Sequence                                       |
|----------------|----------------|---------------|-----------------------|------------------------------------------------|
| polyHis CTRL   |                | A1            | HHHHHHHH              |                                                |
| polyHis CTRL   |                | A2            | HHHHHHHH              |                                                |
|                |                | A3            | Blank                 |                                                |
| H2A.X (P16104) | 1-20           | A4            | CONTROL               | S G R G K T G G K A R A K A K S R S S R        |
|                |                | A5            | K5me                  | S G R G Kme T G G K A R A K A K S R S S R      |
|                |                | A6            | K5me2                 | S G R G Kme2 T G G K A R A K A K S R S S R     |
|                |                | A7            | K5me3                 | S G R G Kme3 T G G K A R A K A K S R S S R     |
|                |                | A8            | K5ac                  | S G R G Kac T G G K A R A K A K S R S S R      |
|                |                | A9            | pT6                   | S G R G K pT G G K A R A K A K S R S S R       |
|                |                | A10           | K9me                  | S G R G K T G G Kme A R A K A K S R S S R      |
|                |                | A11           | K9me2                 | S G R G K T G G Kme2 A R A K A K S R S S R     |
|                |                | A12           | K9me3                 | S G R G K T G G Kme3 A R A K A K S R S S R     |
|                |                | A13           | K9ac                  | S G R G K T G G Kac A R A K A K S R S S R      |
|                |                | A14           | K5me/pT6              | S G R G Kme pT G G K A R A K A K S R S S R     |
|                |                | A15           | K5me2/pT6             | S G R G Kme2 pT G G K A R A K A K S R S S R    |
|                |                | A16           | K5me3/pT6             | S G R G Kme3 pT G G K A R A K A K S R S S R    |
|                |                | A17           | K5ac/pT6              | S G R G Kac pT G G K A R A K A K S R S S R     |
|                |                | A18           | pT6/K9me              | S G R G K pT G G Kme A R A K A K S R S S R     |
|                |                | A19           | pT6/K9me2             | S G R G K pT G G Kme2 A R A K A K S R S S R    |
|                |                | A20           | pT6/K9me3             | S G R G K pT G G Kme3 A R A K A K S R S S R    |
|                |                | A21           | pT6/K9ac              | S G R G K pT G G Kac A R A K A K S R S S R     |
|                |                | A22           | K5me/pT6/K9me         | S G R G Kme pT G G Kme A R A K A K S R S S R   |
|                |                | A23           | K5me/pT6/K9me2        | S G R G Kme pT G G Kme2 A R A K A K S R S S R  |
|                |                | A24           | K5me/pT6/K9me3        | S G R G Kme pT G G Kme3 A R A K A K S R S S R  |
|                |                | A25           | K5me/pT6/K9ac         | S G R G Kme pT G G Kac A R A K A K S R S S R   |
|                |                | A26           | K5me2/pT6/K9me        | S G R G Kme2 pT G G Kme A R A K A K S R S S R  |
|                |                | A27           | K5me2/pT6/K9me2       | S G R G Kme2 pT G G Kme2 A R A K A K S R S S R |
|                |                | A28           | K5me2/pT6/K9me3       | S G R G Kme2 pT G G Kme3 A R A K A K S R S S R |
|                |                | A29           | K5me2/pT6/K9ac        | S G R G Kme2 pT G G Kac A R A K A K S R S S R  |
|                |                | A30           | K5me3/pT6/K9me        | S G R G Kme3 pT G G Kme A R A K A K S R S S R  |
|                |                | A31           | K5me3/pT6/K9me2       | S G R G Kme3 pT G G Kme2 A R A K A K S R S S R |
|                |                | A32           | K5me3/pT6/K9me3       | S G R G Kme3 pT G G Kme3 A R A K A K S R S S R |
|                |                | A33           | K5me3/pT6/K9ac        | S G R G Kme3 pT G G Kac A R A K A K S R S S R  |
|                |                | A34           | K5ac/pT6/K9me         | S G R G Kac pT G G Kme A R A K A K S R S S R   |
|                |                | A35           | K5ac/pT6/K9me2        | S G R G Kac pT G G Kme2 A R A K A K S R S S R  |
|                |                | A36           | K5ac/pT6/K9me3        | S G R G Kac pT G G Kme3 A R A K A K S R S S R  |
|                |                | A37           | K5ac/pT6/K9ac         | S G R G Kac pT G G Kac A R A K A K S R S S R   |
|                |                | B1            | Blank                 |                                                |
|                |                | B2            | CONTROL               | T V G P K A P S G G K K A T Q A S Q E Y        |
|                |                | B3            | K127me                | T V G P Kme A P S G G K K A T Q A S Q E Y      |
|                |                | B4            | K127me2               | T V G P Kme2 A P S G G K K A T Q A S Q E Y     |
|                |                | B5            | K127me3               | T V G P Kme3 A P S G G K K A T Q A S Q E Y     |
|                |                | B6            | K127ac                | T V G P Kac A P S G G K K A T Q A S Q E Y      |
|                |                | B7            | pS130                 | T V G P K A P pS G G K K A T Q A S Q E Y       |
|                |                | B8            | K133me                | T V G P K A P S G G Kme K A T Q A S Q E Y      |
|                |                | B9            | K133me2               | T V G P K A P S G G Kme2 K A T Q A S Q E Y     |
|                |                | B10           | K133me3               | T V G P K A P S G G Kme3 K A T Q A S Q E Y     |
|                |                | B11           | K133ac                | T V G P K A P S G G Kac K A T Q A S Q E Y      |
|                |                | B12           | K134me                | T V G P K A P S G G K Kme K A T Q A S Q E Y    |
|                |                | B13           | K134me2               | T V G P K A P S G G K Kme2 K A T Q A S Q E Y   |
|                |                | B14           | K134me3               | T V G P K A P S G G K Kme3 K A T Q A S Q E Y   |
|                |                | B15           | K134ac                | T V G P K A P S G G K Kac K A T Q A S Q E Y    |
|                |                | B16           | pS136                 | T V G P K A P S G G K K A pT Q A S Q E Y       |
|                |                | B17           | pS139                 | T V G P K A P S G G K K A pS Q E Y             |
|                | 6-25           | B18           | K127me/pS130          | T V G P Kme A P pS G G K K A T Q A S Q E Y     |
|                |                | B19           | K127me2/pS130         | T V G P Kme2 A P pS G G K K A T Q A S Q E Y    |
|                |                | B20           | K127me3/pS130         | T V G P Kme3 A P pS G G K K A T Q A S Q E Y    |
|                |                | B21           | K127ac/pS130          | T V G P Kac A P pS G G K K A T Q A S Q E Y     |
|                |                | B22           | pS130/K133me          | T V G P K A P pS G G Kme K A T Q A S Q E Y     |
|                |                | B23           | pS130/K133me2         | T V G P K A P pS G G Kme2 K A T Q A S Q E Y    |
|                |                | B24           | pS130/K133me3         | T V G P K A P pS G G Kme3 K A T Q A S Q E Y    |
|                |                | B25           | pS130/K133ac          | T V G P K A P pS G G Kac K A T Q A S Q E Y     |
|                |                | B26           | pS130/K134me          | T V G P K A P pS G G K Kme K A T Q A S Q E Y   |
|                |                | B27           | pS130/K134me2         | T V G P K A P pS G G K Kme2 K A T Q A S Q E Y  |
|                |                | B28           | pS130/K134me3         | T V G P K A P pS G G K Kme3 K A T Q A S Q E Y  |
|                |                | B29           | pS130/K134ac          | T V G P K A P pS G G K Kac K A T Q A S Q E Y   |
|                |                | B30           | K133me/pT136          | T V G P K A P S G G K Kme K A pT Q A S Q E Y   |
|                |                | B31           | K133me2/pT136         | T V G P K A P S G G K Kme2 K A pT Q A S Q E Y  |
|                |                | B32           | K133me3/pT136         | T V G P K A P S G G K Kme3 K A pT Q A S Q E Y  |
|                |                | B33           | K133ac/pT136          | T V G P K A P S G G Kac K A pT Q A S Q E Y     |
|                |                | B34           | K134me/pT136          | T V G P K A P S G G K Kme K A pT Q A S Q E Y   |
|                |                | B35           | K134me2/pT136         | T V G P K A P S G G K Kme2 K A pT Q A S Q E Y  |
|                |                | B36           | K134me3/pT136         | T V G P K A P S G G K Kme3 K A pT Q A S Q E Y  |
|                |                | B37           | K134ac/pT136          | T V G P K A P S G G K Kac K A pT Q A S Q E Y   |
|                |                | C1            | K133me/pS139          | T V G P K A P S G G Kme K A T Q A pS Q E Y     |
|                |                | C2            | K133me2/pS139         | T V G P K A P S G G Kme2 K A T Q A pS Q E Y    |
|                |                | C3            | K133me3/pS139         | T V G P K A P S G G Kme3 K A T Q A pS Q E Y    |
|                |                | C4            | K133ac/pS139          | T V G P K A P S G G Kac K A T Q A pS Q E Y     |
|                |                | C5            | K134me/pS139          | T V G P K A P S G G K Kme K A T Q A pS Q E Y   |
|                |                | C6            | K134me2/pS139         | T V G P K A P S G G K Kme2 K A T Q A pS Q E Y  |
|                |                | C7            | K134me3/pS139         | T V G P K A P S G G K Kme3 K A T Q A pS Q E Y  |
|                |                | C8            | K134ac/pS139          | T V G P K A P S G G Kac K A T Q A pS Q E Y     |
|                |                | C9            | K127me/K133me         | T V G P Kme A P S G G Kme K A T Q A S Q E Y    |
|                |                | C10           | K127me/K133me2        | T V G P Kme A P S G G Kme2 K A T Q A S Q E Y   |
|                |                | C11           | K127me/K133me3        | T V G P Kme A P S G G Kme3 K A T Q A S Q E Y   |
|                |                | C12           | K127me/K133ac         | T V G P Kme A P S G G Kac K A T Q A S Q E Y    |
|                |                | C13           | K127me2/K133me        | T V G P Kme2 A P S G G Kme K A T Q A S Q E Y   |
|                |                | C14           | K127me2/K133me2       | T V G P Kme2 A P S G G Kme2 K A T Q A S Q E Y  |
|                |                | C15           | K127me2/K133me3       | T V G P Kme2 A P S G G Kme3 K A T Q A S Q E Y  |
|                |                | C16           | K127me2/K133ac        | T V G P Kme2 A P S G G Kac K A T Q A S Q E Y   |
|                |                | C17           | K127me3/K133me        | T V G P Kme3 A P S G G Kme K A T Q A S Q E Y   |
|                |                | C18           | K127me3/K133me2       | T V G P Kme3 A P S G G Kme2 K A T Q A S Q E Y  |
|                |                | C19           | K127me3/K133me3       | T V G P Kme3 A P S G G Kme3 K A T Q A S Q E Y  |
|                |                | C20           | K127me3/K133ac        | T V G P Kme3 A P S G G Kac K A T Q A S Q E Y   |
|                |                | C21           | K127ac/K133me         | T V G P Kac A P S G G Kme K A T Q A S Q E Y    |
|                |                | C22           | K127ac/K133me2        | T V G P Kac A P S G G Kme2 K A T Q A S Q E Y   |
|                |                | C23           | K127ac/K133me3        | T V G P Kac A P S G G Kme3 K A T Q A S Q E Y   |
|                |                | C24           | K127ac/K133ac         | T V G P Kac A P S G G Kac K A T Q A S Q E Y    |
|                |                | C25           | K127me/K134me         | T V G P Kme A P S G G K Kme K A T Q A S Q E Y  |
|                |                | C26           | K127me/K134me2        | T V G P Kme A P S G G K Kme2 K A T Q A S Q E Y |
|                |                | C27           | K127me/K134me3        | T V G P Kme A P S G G K Kme3 K A T Q A S Q E Y |

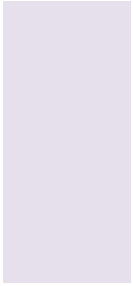

|            |                            |   |   |   |   |      |   |   |   |   |   |     |      |   |   |   |   |    |   |   |   |
|------------|----------------------------|---|---|---|---|------|---|---|---|---|---|-----|------|---|---|---|---|----|---|---|---|
| <b>C28</b> | K127me/K134ac              | T | V | G | P | Kme  | A | P | S | G | G | K   | Kac  | A | T | Q | A | S  | Q | E | Y |
| <b>C29</b> | K127me2/K134me             | T | V | G | P | Kme2 | A | P | S | G | G | K   | Kme  | A | T | Q | A | S  | Q | E | Y |
| <b>C30</b> | K127me2/K134me2            | T | V | G | P | Kme2 | A | P | S | G | G | K   | Kme2 | A | T | Q | A | S  | Q | E | Y |
| <b>C31</b> | K127me2/K134me3            | T | V | G | P | Kme2 | A | P | S | G | G | K   | Kme3 | A | T | Q | A | S  | Q | E | Y |
| <b>C32</b> | K127me2/K134ac             | T | V | G | P | Kme2 | A | P | S | G | G | K   | Kac  | A | T | Q | A | S  | Q | E | Y |
| <b>C33</b> | K127me3/K134me             | T | V | G | P | Kme3 | A | P | S | G | G | K   | Kme  | A | T | Q | A | S  | Q | E | Y |
| <b>C34</b> | K127me3/K134me2            | T | V | G | P | Kme3 | A | P | S | G | G | K   | Kme2 | A | T | Q | A | S  | Q | E | Y |
| <b>C35</b> | K127me3/K134me3            | T | V | G | P | Kme3 | A | P | S | G | G | K   | Kme3 | A | T | Q | A | S  | Q | E | Y |
| <b>C36</b> | K127me3/K134ac             | T | V | G | P | Kme3 | A | P | S | G | G | K   | Kac  | A | T | Q | A | S  | Q | E | Y |
| <b>C37</b> | K127ac/K134me              | T | V | G | P | Kac  | A | P | S | G | G | K   | Kme  | A | T | Q | A | S  | Q | E | Y |
| <b>D1</b>  | K127ac/K134me2             | T | V | G | P | Kac  | A | P | S | G | G | K   | Kme2 | A | T | Q | A | S  | Q | E | Y |
| <b>D2</b>  | K127ac/K134me3             | T | V | G | P | Kac  | A | P | S | G | G | K   | Kme3 | A | T | Q | A | S  | Q | E | Y |
| <b>D3</b>  | K127ac/K134ac              | T | V | G | P | Kac  | A | P | S | G | G | K   | Kac  | A | T | Q | A | S  | Q | E | Y |
| <b>D4</b>  | K127ac/K133ac/K134ac       | T | V | G | P | Kac  | A | P | S | G | G | Kac | Kac  | A | T | Q | A | S  | Q | E | Y |
| <b>D5</b>  | K127ac/K133ac/K134ac/pS139 | T | V | G | P | Kac  | A | P | S | G | G | Kac | Kac  | A | T | Q | A | pS | Q | E | Y |

| Histone        | Peptide Length | Array Position | Kac Mark Combinations | Sequence                                       |
|----------------|----------------|----------------|-----------------------|------------------------------------------------|
| polyHis CTRL   |                | A1             | HHHHHHHH              |                                                |
| polyHis CTRL   |                | A2             | HHHHHHHH              |                                                |
|                |                | A3             | Blank                 |                                                |
| H2A.Z (P0C0S5) | 1-20           | A4             | CONTROL               | A G G K A G K D S G K A K T K A V S R S        |
|                |                | A5             | K4me                  | A G G Kme A G K D S G K A K T K A V S R S      |
|                |                | A6             | K4me2                 | A G G Kme2 A G K D S G K A K T K A V S R S     |
|                |                | A7             | K4me3                 | A G G Kme3 A G K D S G K A K T K A V S R S     |
|                |                | A8             | K4ac                  | A G G Kac A G K D S G K A K T K A V S R S      |
|                |                | A9             | K7me                  | A G G K A G Kme D S G K A K T K A V S R S      |
|                |                | A10            | K7me2                 | A G G K A G Kme2 D S G K A K T K A V S R S     |
|                |                | A11            | K7me3                 | A G G K A G Kme3 D S G K A K T K A V S R S     |
|                |                | A12            | K7ac                  | A G G K A G Kac D S G K A K T K A V S R S      |
|                |                | A13            | pS9                   | A G G K A G K D pS G K A K T K A V S R S       |
|                |                | A14            | K11me                 | A G G K A G K D S G Kme A K T K A V S R S      |
|                |                | A15            | K11me2                | A G G K A G K D S G Kme2 A K T K A V S R S     |
|                |                | A16            | K11me3                | A G G K A G K D S G Kme3 A K T K A V S R S     |
|                |                | A17            | K11ac                 | A G G K A G K D S G Kac A K T K A V S R S      |
|                |                | A18            | K13me                 | A G G K A G K D S G K A Kme T K A V S R S      |
|                |                | A19            | K13me2                | A G G K A G K D S G K A Kme2 T K A V S R S     |
|                |                | A20            | K13me3                | A G G K A G K D S G K A Kme3 T K A V S R S     |
|                |                | A21            | K13ac                 | A G G K A G K D S G K A Kac T K A V S R S      |
|                |                | A22            | K4me/K7me             | A G G Kme A G Kme D S G K A K T K A V S R S    |
|                |                | A23            | K4me/K7me2            | A G G Kme A G Kme2 D S G K A K T K A V S R S   |
|                |                | A24            | K4me/K7me3            | A G G Kme A G Kme3 D S G K A K T K A V S R S   |
|                |                | A25            | K4me/K7ac             | A G G Kme A G Kac D S G K A K T K A V S R S    |
|                |                | A26            | K4me2/K7me            | A G G Kme2 A G Kme D S G K A K T K A V S R S   |
|                |                | A27            | K4me2/K7me2           | A G G Kme2 A G Kme2 D S G K A K T K A V S R S  |
|                |                | A28            | K4me2/K7me3           | A G G Kme2 A G Kme3 D S G K A K T K A V S R S  |
|                |                | A29            | K4me2/K7ac            | A G G Kme2 A G Kac D S G K A K T K A V S R S   |
|                |                | A30            | K4me3/K7me            | A G G Kme3 A G Kme D S G K A K T K A V S R S   |
|                |                | A31            | K4me3/K7me2           | A G G Kme3 A G Kme2 D S G K A K T K A V S R S  |
|                |                | A32            | K4me3/K7me3           | A G G Kme3 A G Kme3 D S G K A K T K A V S R S  |
|                |                | A33            | K4me3/K7ac            | A G G Kme3 A G Kac D S G K A K T K A V S R S   |
|                |                | A34            | K4ac/K7me             | A G G Kac A G Kme D S G K A K T K A V S R S    |
|                |                | A35            | K4ac/K7me2            | A G G Kac A G Kme2 D S G K A K T K A V S R S   |
|                |                | A36            | K4ac/K7me3            | A G G Kac A G Kme3 D S G K A K T K A V S R S   |
|                |                | A37            | K4ac/K7ac             | A G G Kac A G Kac D S G K A K T K A V S R S    |
|                |                | B1             | K4me/pS9              | A G G Kme A G K D pS G K A K T K A V S R S     |
|                |                | B2             | K4me2/pS9             | A G G Kme2 A G K D pS G K A K T K A V S R S    |
|                |                | B3             | K4me3/pS9             | A G G Kme3 A G K D pS G K A K T K A V S R S    |
|                |                | B4             | K4ac/pS9              | A G G Kac A G K D pS G K A K T K A V S R S     |
|                |                | B5             | K7me/pS9              | A G G K A G Kme D pS G K A K T K A V S R S     |
|                |                | B6             | K7me2/pS9             | A G G K A G Kme2 D pS G K A K T K A V S R S    |
|                |                | B7             | K7me3/pS9             | A G G K A G Kme3 D pS G K A K T K A V S R S    |
|                |                | B8             | K7ac/pS9              | A G G K A G Kac D pS G K A K T K A V S R S     |
|                |                | B9             | pS9/K11me             | A G G K A G K D pS G Kme A K T K A V S R S     |
|                |                | B10            | pS9/K11me2            | A G G K A G K D pS G Kme2 A K T K A V S R S    |
|                |                | B11            | pS9/K11me3            | A G G K A G K D pS G Kme3 A K T K A V S R S    |
|                |                | B12            | pS9/K11ac             | A G G K A G K D pS G Kac A K T K A V S R S     |
|                |                | B13            | K7me/K11me            | A G G K A G Kme D S G Kme A K T K A V S R S    |
|                |                | B14            | K7me/K11me2           | A G G K A G Kme D S G Kme2 A K T K A V S R S   |
|                |                | B15            | K7me/K11me3           | A G G K A G Kme D S G Kme3 A K T K A V S R S   |
|                |                | B16            | K7me/K11ac            | A G G K A G Kme D S G Kac A K T K A V S R S    |
|                |                | B17            | K7me2/K11me           | A G G K A G Kme2 D S G Kme A K T K A V S R S   |
|                |                | B18            | K7me2/K11me2          | A G G K A G Kme2 D S G Kme2 A K T K A V S R S  |
|                |                | B19            | K7me2/K11me3          | A G G K A G Kme2 D S G Kme3 A K T K A V S R S  |
|                |                | B20            | K7me2/K11ac           | A G G K A G Kme2 D S G Kac A K T K A V S R S   |
|                |                | B21            | K7me3/K11me           | A G G K A G Kme3 D S G Kme A K T K A V S R S   |
|                |                | B22            | K7me3/K11me2          | A G G K A G Kme3 D S G Kme2 A K T K A V S R S  |
|                |                | B23            | K7me3/K11me3          | A G G K A G Kme3 D S G Kme3 A K T K A V S R S  |
|                |                | B24            | K7me3/K11ac           | A G G K A G Kme3 D S G Kac A K T K A V S R S   |
|                |                | B25            | K7ac/K11me            | A G G K A G Kac D S G Kme A K T K A V S R S    |
|                |                | B26            | K7ac/K11me2           | A G G K A G Kac D S G Kme2 A K T K A V S R S   |
|                |                | B27            | K7ac/K11me3           | A G G K A G Kac D S G Kme3 A K T K A V S R S   |
|                |                | B28            | K7ac/K11ac            | A G G K A G Kac D S G Kac A K T K A V S R S    |
|                |                | B29            | K7me/pS9/K11me        | A G G K A G Kme D pS G Kme A K T K A V S R S   |
|                |                | B30            | K7me/pS9/K11me2       | A G G K A G Kme D pS G Kme2 A K T K A V S R S  |
|                |                | B31            | K7me/pS9/K11me3       | A G G K A G Kme D pS G Kme3 A K T K A V S R S  |
|                |                | B32            | K7me/pS9/K11ac        | A G G K A G Kme D pS G Kac A K T K A V S R S   |
|                |                | B33            | K7me2/pS9/K11me       | A G G K A G Kme2 D pS G Kme A K T K A V S R S  |
|                |                | B34            | K7me2/pS9/K11me2      | A G G K A G Kme2 D pS G Kme2 A K T K A V S R S |
|                |                | B35            | K7me2/pS9/K11me3      | A G G K A G Kme2 D pS G Kme3 A K T K A V S R S |
|                |                | B36            | K7me2/pS9/K11ac       | A G G K A G Kme2 D pS G Kac A K T K A V S R S  |
|                |                | B37            | K7me3/pS9/K11me       | A G G K A G Kme3 D pS G Kme A K T K A V S R S  |
|                |                | C1             | K7me3/pS9/K11me2      | A G G K A G Kme3 D pS G Kme2 A K T K A V S R S |
|                |                | C2             | K7me3/pS9/K11me3      | A G G K A G Kme3 D pS G Kme3 A K T K A V S R S |
|                |                | C3             | K7me3/pS9/K11ac       | A G G K A G Kme3 D pS G Kac A K T K A V S R S  |
|                |                | C4             | K7ac/pS9/K11me        | A G G K A G Kac D pS G Kme A K T K A V S R S   |
|                |                | C5             | K7ac/pS9/K11me2       | A G G K A G Kac D pS G Kme2 A K T K A V S R S  |
|                |                | C6             | K7ac/pS9/K11me3       | A G G K A G Kac D pS G Kme3 A K T K A V S R S  |
|                |                | C7             | K7ac/pS9/K11ac        | A G G K A G Kac D pS G Kac A K T K A V S R S   |
|                |                | C8             | K11me/K13me           | A G G K A G K D S G Kme A Kme T K A V S R S    |
|                |                | C9             | K11me/K13me2          | A G G K A G K D S G Kme A Kme2 T K A V S R S   |
|                |                | C10            | K11me/K13me3          | A G G K A G K D S G Kme A Kme3 T K A V S R S   |
|                |                | C11            | K11me/K13ac           | A G G K A G K D S G Kme A Kac T K A V S R S    |
|                |                | C12            | K11me2/K13me          | A G G K A G K D S G Kme2 A Kme T K A V S R S   |
|                |                | C13            | K11me2/K13me2         | A G G K A G K D S G Kme2 A Kme2 T K A V S R S  |
|                |                | C14            | K11me2/K13me3         | A G G K A G K D S G Kme2 A Kme3 T K A V S R S  |
|                |                | C15            | K11me2/K13ac          | A G G K A G K D S G Kme2 A Kac T K A V S R S   |
|                |                | C16            | K11me3/K13me          | A G G K A G K D S G Kme3 A Kme T K A V S R S   |
|                |                | C17            | K11me3/K13me2         | A G G K A G K D S G Kme3 A Kme2 T K A V S R S  |
|                |                | C18            | K11me3/K13me3         | A G G K A G K D S G Kme3 A Kme3 T K A V S R S  |
|                |                | C19            | K11me3/K13ac          | A G G K A G K D S G Kme3 A Kac T K A V S R S   |
|                |                | C20            | K11ac/K13me           | A G G K A G K D S G Kac A Kme T K A V S R S    |
|                |                | C21            | K11ac/K13me2          | A G G K A G K D S G Kac A Kme2 T K A V S R S   |
|                |                | C22            | K11ac/K13me3          | A G G K A G K D S G Kac A Kme3 T K A V S R S   |
|                |                | C23            | K11ac/K13ac           | A G G K A G K D S G Kac A Kac T K A V S R S    |
|                |                | C24            | CONTROL               | G K D S G K A K T K A V S R S Q R A G L        |
|                |                | C25            | K11me                 | G K D S G Kme A K T K A V S R S Q R A G L      |
|                |                | C26            | K11me2                | G K D S G Kme2 A K T K A V S R S Q R A G L     |
|                |                | C27            | K11me3                | G K D S G Kme3 A K T K A V S R S Q R A G L     |
|                |                | C28            | K11ac                 | G K D S G Kac A K T K A V S R S Q R A G L      |
|                |                | C29            | K13me                 | G K D S G K A Kme T K A V S R S Q R A G L      |
|                |                | C30            | K13me2                | G K D S G K A Kme2 T K A V S R S Q R A G L     |
|                |                | C31            | K13me3                | G K D S G K A Kme3 T K A V S R S Q R A G L     |
|                |                | C32            | K13ac                 | G K D S G K A Kac T K A V S R S Q R A G L      |

|     |                    |   |   |   |   |      |      |   |      |    |      |   |   |   |   |   |   |   |   |   |   |
|-----|--------------------|---|---|---|---|------|------|---|------|----|------|---|---|---|---|---|---|---|---|---|---|
| C33 | K13ac              | G | K | D | S | G    | K    | A | Kac  | T  | K    | A | V | S | R | S | Q | R | A | G | L |
| C34 | pT14               | G | K | D | S | G    | K    | A | K    | pT | K    | A | V | S | R | S | Q | R | A | G | L |
| C35 | K15me              | G | K | D | S | G    | K    | A | K    | T  | Kme  | A | V | S | R | S | Q | R | A | G | L |
| C36 | K15me2             | G | K | D | S | G    | K    | A | K    | T  | Kme2 | A | V | S | R | S | Q | R | A | G | L |
| C37 | K15me3             | G | K | D | S | G    | K    | A | K    | T  | Kme3 | A | V | S | R | S | Q | R | A | G | L |
| D1  | K15ac              | G | K | D | S | G    | K    | A | K    | T  | Kac  | A | V | S | R | S | Q | R | A | G | L |
| D2  | K11me/K13me        | G | K | D | S | G    | Kme  | A | Kme  | T  | K    | A | V | S | R | S | Q | R | A | G | L |
| D3  | K11me/K13me2       | G | K | D | S | G    | Kme  | A | Kme2 | T  | K    | A | V | S | R | S | Q | R | A | G | L |
| D4  | K11me/K13me3       | G | K | D | S | G    | Kme  | A | Kme3 | T  | K    | A | V | S | R | S | Q | R | A | G | L |
| D5  | K11me/K13ac        | G | K | D | S | G    | Kme  | A | Kac  | T  | K    | A | V | S | R | S | Q | R | A | G | L |
| D6  | K11me2/K13me       | G | K | D | S | G    | Kme2 | A | Kme  | T  | K    | A | V | S | R | S | Q | R | A | G | L |
| D7  | K11me2/K13me2      | G | K | D | S | G    | Kme2 | A | Kme2 | T  | K    | A | V | S | R | S | Q | R | A | G | L |
| D8  | K11me2/K13me3      | G | K | D | S | G    | Kme2 | A | Kme3 | T  | K    | A | V | S | R | S | Q | R | A | G | L |
| D9  | K11me2/K13ac       | G | K | D | S | G    | Kme2 | A | Kac  | T  | K    | A | V | S | R | S | Q | R | A | G | L |
| D10 | K11me3/K13me       | G | K | D | S | G    | Kme3 | A | Kme  | T  | K    | A | V | S | R | S | Q | R | A | G | L |
| D11 | K11me3/K13me2      | G | K | D | S | G    | Kme3 | A | Kme2 | T  | K    | A | V | S | R | S | Q | R | A | G | L |
| D12 | K11me3/K13me3      | G | K | D | S | G    | Kme3 | A | Kme3 | T  | K    | A | V | S | R | S | Q | R | A | G | L |
| D13 | K11me3/K13ac       | G | K | D | S | G    | Kme3 | A | Kac  | T  | K    | A | V | S | R | S | Q | R | A | G | L |
| D14 | K11ac/K13me        | G | K | D | S | G    | Kac  | A | Kme  | T  | K    | A | V | S | R | S | Q | R | A | G | L |
| D15 | K11ac/K13me2       | G | K | D | S | G    | Kac  | A | Kme2 | T  | K    | A | V | S | R | S | Q | R | A | G | L |
| D16 | K11ac/K13me3       | G | K | D | S | G    | Kac  | A | Kme3 | T  | K    | A | V | S | R | S | Q | R | A | G | L |
| D17 | K11ac/K13ac        | G | K | D | S | G    | Kac  | A | Kac  | T  | K    | A | V | S | R | S | Q | R | A | G | L |
| D18 | K11me/K15me        | G | K | D | S | G    | Kme  | A | K    | T  | Kme  | A | V | S | R | S | Q | R | A | G | L |
| D19 | K11me/K15me2       | G | K | D | S | G    | Kme  | A | K    | T  | Kme2 | A | V | S | R | S | Q | R | A | G | L |
| D20 | K11me/K15me3       | G | K | D | S | G    | Kme  | A | K    | T  | Kme3 | A | V | S | R | S | Q | R | A | G | L |
| D21 | K11me/K15ac        | G | K | D | S | G    | Kme  | A | K    | T  | Kac  | A | V | S | R | S | Q | R | A | G | L |
| D22 | K11me2/K15me       | G | K | D | S | G    | Kme2 | A | K    | T  | Kme  | A | V | S | R | S | Q | R | A | G | L |
| D23 | K11me2/K15me2      | G | K | D | S | G    | Kme2 | A | K    | T  | Kme2 | A | V | S | R | S | Q | R | A | G | L |
| D24 | K11me2/K15me3      | G | K | D | S | G    | Kme2 | A | K    | T  | Kme3 | A | V | S | R | S | Q | R | A | G | L |
| D25 | K11me2/K15ac       | G | K | D | S | G    | Kme2 | A | K    | T  | Kac  | A | V | S | R | S | Q | R | A | G | L |
| D26 | K11me3/K15me       | G | K | D | S | G    | Kme3 | A | K    | T  | Kme  | A | V | S | R | S | Q | R | A | G | L |
| D27 | K11me3/K15me2      | G | K | D | S | G    | Kme3 | A | K    | T  | Kme2 | A | V | S | R | S | Q | R | A | G | L |
| D28 | K11me3/K15me3      | G | K | D | S | G    | Kme3 | A | K    | T  | Kme3 | A | V | S | R | S | Q | R | A | G | L |
| D29 | K11me3/K15ac       | G | K | D | S | G    | Kme3 | A | K    | T  | Kac  | A | V | S | R | S | Q | R | A | G | L |
| D30 | K11ac/K15me        | G | K | D | S | G    | Kac  | A | K    | T  | Kme  | A | V | S | R | S | Q | R | A | G | L |
| D31 | K11ac/K15me2       | G | K | D | S | G    | Kac  | A | K    | T  | Kme2 | A | V | S | R | S | Q | R | A | G | L |
| D32 | K11ac/K15me3       | G | K | D | S | G    | Kac  | A | K    | T  | Kme3 | A | V | S | R | S | Q | R | A | G | L |
| D33 | K11ac/K15ac        | G | K | D | S | G    | Kac  | A | K    | T  | Kac  | A | V | S | R | S | Q | R | A | G | L |
| D34 | K11me/pT14         | G | K | D | S | G    | Kme  | A | K    | pT | K    | A | V | S | R | S | Q | R | A | G | L |
| D35 | K11me2/pT14        | G | K | D | S | G    | Kme2 | A | K    | pT | K    | A | V | S | R | S | Q | R | A | G | L |
| D36 | K11me3/pT14        | G | K | D | S | G    | Kme3 | A | K    | pT | K    | A | V | S | R | S | Q | R | A | G | L |
| D37 | K11ac/pT14         | G | K | D | S | G    | Kac  | A | K    | pT | K    | A | V | S | R | S | Q | R | A | G | L |
| E1  | K13me/pT14         | G | K | D | S | G    | K    | A | Kme  | pT | K    | A | V | S | R | S | Q | R | A | G | L |
| E2  | K13me2/pT14        | G | K | D | S | G    | K    | A | Kme2 | pT | K    | A | V | S | R | S | Q | R | A | G | L |
| E3  | K13me3/pT14        | G | K | D | S | G    | K    | A | Kme3 | pT | K    | A | V | S | R | S | Q | R | A | G | L |
| E4  | K13ac/pT14         | G | K | D | S | G    | K    | A | Kac  | pT | K    | A | V | S | R | S | Q | R | A | G | L |
| E5  | pT14/K15me         | G | K | D | S | G    | K    | A | K    | pT | Kme  | A | V | S | R | S | Q | R | A | G | L |
| E6  | pT14/K15me2        | G | K | D | S | G    | K    | A | K    | pT | Kme2 | A | V | S | R | S | Q | R | A | G | L |
| E7  | pT14/K15me3        | G | K | D | S | G    | K    | A | K    | pT | Kme3 | A | V | S | R | S | Q | R | A | G | L |
| E8  | pT14/K15ac         | G | K | D | S | G    | K    | A | K    | pT | Kac  | A | V | S | R | S | Q | R | A | G | L |
| E9  | K11me/K13me/pT14   | G | K | D | S | G    | Kme  | A | Kme  | pT | K    | A | V | S | R | S | Q | R | A | G | L |
| E10 | K11me/K13me2/pT14  | G | K | D | S | G    | Kme  | A | Kme2 | pT | K    | A | V | S | R | S | Q | R | A | G | L |
| E11 | K11me/K13me3/pT14  | G | K | D | S | G    | Kme  | A | Kme3 | pT | K    | A | V | S | R | S | Q | R | A | G | L |
| E12 | K11me/K13ac/pT14   | G | K | D | S | G    | Kme  | A | Kac  | pT | K    | A | V | S | R | S | Q | R | A | G | L |
| E13 | K11me2/K13me/pT14  | G | K | D | S | G    | Kme2 | A | Kme  | pT | K    | A | V | S | R | S | Q | R | A | G | L |
| E14 | K11me2/K13me2/pT14 | G | K | D | S | G    | Kme2 | A | Kme2 | pT | K    | A | V | S | R | S | Q | R | A | G | L |
| E15 | K11me2/K13me3/pT14 | G | K | D | S | G    | Kme2 | A | Kme3 | pT | K    | A | V | S | R | S | Q | R | A | G | L |
| E16 | K11me2/K13ac/pT14  | G | K | D | S | G    | Kme2 | A | Kac  | pT | K    | A | V | S | R | S | Q | R | A | G | L |
| E17 | K11me3/K13me/pT14  | G | K | D | S | G    | Kme3 | A | Kme  | pT | K    | A | V | S | R | S | Q | R | A | G | L |
| E18 | K11me3/K13me2/pT14 | G | K | D | S | G    | Kme3 | A | Kme2 | pT | K    | A | V | S | R | S | Q | R | A | G | L |
| E19 | K11me3/K13me3/pT14 | G | K | D | S | G    | Kme3 | A | Kme3 | pT | K    | A | V | S | R | S | Q | R | A | G | L |
| E20 | K11me3/K13ac/pT14  | G | K | D | S | G    | Kme3 | A | Kac  | pT | K    | A | V | S | R | S | Q | R | A | G | L |
| E21 | K11ac/K13me/pT14   | G | K | D | S | G    | Kac  | A | Kme  | pT | K    | A | V | S | R | S | Q | R | A | G | L |
| E22 | K11ac/K13me2/pT14  | G | K | D | S | G    | Kac  | A | Kme2 | pT | K    | A | V | S | R | S | Q | R | A | G | L |
| E23 | K11ac/K13me3/pT14  | G | K | D | S | G    | Kac  | A | Kme3 | pT | K    | A | V | S | R | S | Q | R | A | G | L |
| E24 | K11ac/K13ac/pT14   | G | K | D | S | G    | Kac  | A | Kac  | pT | K    | A | V | S | R | S | Q | R | A | G | L |
| E25 | K11me/pT14/K15me   | G | K | D | S | G    | Kme  | A | K    | pT | Kme  | A | V | S | R | S | Q | R | A | G | L |
| E26 | K11me/pT14/K15me2  | G | K | D | S | G    | Kme  | A | K    | pT | Kme2 | A | V | S | R | S | Q | R | A | G | L |
| E27 | K11me/pT14/K15me3  | G | K | D | S | G    | Kme  | A | K    | pT | Kme3 | A | V | S | R | S | Q | R | A | G | L |
| E28 | K11me/pT14/K15ac   | G | K | D | S | G    | Kme  | A | K    | pT | Kac  | A | V | S | R | S | Q | R | A | G | L |
| E29 | K11me2/pT14/K15me  | G | K | D | S | G    | Kme2 | A | K    | pT | Kme  | A | V | S | R | S | Q | R | A | G | L |
| E30 | K11me2/pT14/K15me2 | G | K | D | S | G    | Kme2 | A | K    | pT | Kme2 | A | V | S | R | S | Q | R | A | G | L |
| E31 | K11me2/pT14/K15me3 | G | K | D | S | G    | Kme2 | A | K    | pT | Kme3 | A | V | S | R | S | Q | R | A | G | L |
| E32 | K11me2/pT14/K15ac  | G | K | D | S | G    | Kme2 | A | K    | pT | Kac  | A | V | S | R | S | Q | R | A | G | L |
| E33 | K11me3/pT14/K15me  | G | K | D | S | G    | Kme3 | A | K    | pT | Kme  | A | V | S | R | S | Q | R | A | G | L |
| E34 | K11me3/pT14/K15me2 | G | K | D | S | G    | Kme3 | A | K    | pT | Kme2 | A | V | S | R | S | Q | R | A | G | L |
| E35 | K11me3/pT14/K15me3 | G | K | D | S | G    | Kme3 | A | K    | pT | Kme3 | A | V | S | R | S | Q | R | A | G | L |
| E36 | K11me3/pT14/K15ac  | G | K | D | S | G    | Kme3 | A | K    | pT | Kac  | A | V | S | R | S | Q | R | A | G | L |
| E37 | K11ac/pT14/K15me   | G | K | D | S | G    | Kac  | A | K    | pT | Kme  | A | V | S | R | S | Q | R | A | G | L |
| F1  | K11ac/pT14/K15me2  | G | K | D | S | G    | Kac  | A | K    | pT | Kme2 | A | V | S | R | S | Q | R | A | G | L |
| F2  | K11ac/pT14/K15me3  | G | K | D | S | G    | Kac  | A | K    | pT | Kme3 | A | V | S | R | S | Q | R | A | G | L |
| F3  | K11ac/pT14/K15ac   | G | K | D | S | G    | Kac  | A | K    | pT | Kac  | A | V | S | R | S | Q | R | A | G | L |
| F4  | K11ac/K13ac/K15ac  | G | K | D | S | G    | Kac  | A | Kac  | T  | Kac  | A | V | S | R | S | Q | R | A | G | L |
| F5  | CONTROL            | K | A | K | T | K    | A    | V | S    | R  | S    | Q | R | A | G | L | Q | F | P | V | G |
| F7  | K15me              | K | A | K | T | Kme  | A    | V | S    | R  | S    | Q | R | A | G | L | Q | F | P | V | G |
| F8  | K15me2             | K | A | K | T | Kme2 | A    | V | S    | R  | S    | Q | R | A | G | L | Q | F | P | V | G |
| F9  | K15me3             | K | A | K | T | Kme3 | A    | V | S    | R  | S    | Q | R | A | G | L | Q | F | P | V | G |
| F10 | K15ac              | K | A | K | T | Kac  | A    | V | S    | R  | S    | Q | R | A | G | L | Q | F | P | V | G |
| F11 | pS18               | K | A | K | T | K    | A    | V | pS   | R  | S    | Q | R | A | G | L | Q | F | P | V | G |
| F12 | pS20               | K | A | K | T | K    | A    | V | S    | R  | pS   | Q | R | A | G | L | Q | F | P | V | G |
| F13 | K15me/pS18         | K | A | K | T | Kme  | A    | V | pS   | R  | S    | Q | R | A | G | L | Q | F | P | V | G |
| F14 | K15me2/pS18        | K | A | K | T | Kme2 | A    | V | pS   | R  | S    | Q | R | A | G | L | Q | F | P | V | G |
| F15 | K15me3/pS18        | K | A | K | T | Kme3 | A    | V | pS   | R  | S    | Q | R | A | G | L | Q | F | P | V | G |
| F16 | K15ac/pS18         | K | A | K | T | Kac  | A    | V | pS   | R  | S    | Q | R | A | G | L | Q | F | P | V | G |
| F17 | K15me/pS20         | K | A | K | T | Kme  | A    | V | S    | R  | pS   | Q | R | A | G | L | Q | F | P | V | G |
| F18 | K15me2/pS20        | K | A | K | T | Kme  |      |   |      |    |      |   |   |   |   |   |   |   |   |   |   |

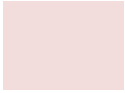

|            |             |   |   |   |   |   |   |   |   |   |   |   |      |    |   |   |   |   |   |   |   |
|------------|-------------|---|---|---|---|---|---|---|---|---|---|---|------|----|---|---|---|---|---|---|---|
| <b>F31</b> | pS38        | Q | F | P | V | G | R | I | H | R | H | L | K    | pS | R | T | T | S | H | G | R |
| <b>F32</b> | K37me/pS38  | Q | F | P | V | G | R | I | H | R | H | L | Kme  | pS | R | T | T | S | H | G | R |
| <b>F33</b> | K37me2/pS38 | Q | F | P | V | G | R | I | H | R | H | L | Kme2 | pS | R | T | T | S | H | G | R |
| <b>F34</b> | K37me3/pS38 | Q | F | P | V | G | R | I | H | R | H | L | Kme3 | pS | R | T | T | S | H | G | R |
| <b>F35</b> | K37ac/pS38  | Q | F | P | V | G | R | I | H | R | H | L | Kac  | pS | R | T | T | S | H | G | R |

| Histone      | Peptide Length   | Array Position                                   | Kac Mark Combinations                         | Sequence                                         |                                            |
|--------------|------------------|--------------------------------------------------|-----------------------------------------------|--------------------------------------------------|--------------------------------------------|
| polyHis CTRL |                  | A1                                               | HHHHHHHH                                      |                                                  |                                            |
| polyHis CTRL |                  | A2                                               | HHHHHHHH                                      |                                                  |                                            |
|              |                  | A3                                               | Blank                                         |                                                  |                                            |
| H2B (Q6F13)  | 1-20             | A4                                               | CONTROL                                       | P E P A K S A P A P K K G S K K A V T K          |                                            |
|              |                  | A5                                               | K5me                                          | P E P A Kme S A P A P K K G S K K A V T K        |                                            |
|              |                  | A6                                               | K5me2                                         | P E P A Kme2 S A P A P K K G S K K A V T K       |                                            |
|              |                  | A7                                               | K5me3                                         | P E P A Kme3 S A P A P K K G S K K A V T K       |                                            |
|              |                  | A8                                               | K5ac                                          | P E P A Kac S A P A P K K G S K K A V T K        |                                            |
|              |                  | A9                                               | pS6                                           | P E P A K pS S A P A P K K G S K K A V T K       |                                            |
|              |                  | A10                                              | K11me                                         | P E P A K S A P A P Kme K G S K K A V T K        |                                            |
|              |                  | A11                                              | K11me2                                        | P E P A K S A P A P Kme2 K G S K K A V T K       |                                            |
|              |                  | A12                                              | K11me3                                        | P E P A K S A P A P Kme3 K G S K K A V T K       |                                            |
|              |                  | A13                                              | K11ac                                         | P E P A K S A P A P Kac K G S K K A V T K        |                                            |
|              |                  | A14                                              | K12me                                         | P E P A K S A P A P K Kme G S K K A V T K        |                                            |
|              |                  | A15                                              | K12me2                                        | P E P A K S A P A P K Kme2 G S K K A V T K       |                                            |
|              |                  | A16                                              | K12me3                                        | P E P A K S A P A P K Kme3 G S K K A V T K       |                                            |
|              |                  | A17                                              | K12ac                                         | P E P A K S A P A P K Kac G S K K A V T K        |                                            |
|              |                  | A18                                              | pS14                                          | P E P A K S A P A P K K G pS K K A V T K         |                                            |
|              |                  | A19                                              | K5me/pS6                                      | P E P A Kme pS S A P A P K K G S K K A V T K     |                                            |
|              |                  | A20                                              | K5me2/pS6                                     | P E P A Kme2 pS S A P A P K K G S K K A V T K    |                                            |
|              |                  | A21                                              | K5me3/pS6                                     | P E P A Kme3 pS S A P A P K K G S K K A V T K    |                                            |
|              |                  | A22                                              | K5ac/pS6                                      | P E P A Kac pS S A P A P K K G S K K A V T K     |                                            |
|              |                  | A23                                              | K5me/K11me                                    | P E P A Kme S A P A P Kme K G S K K A V T K      |                                            |
|              |                  | A24                                              | K5me/K11me2                                   | P E P A Kme S A P A P Kme2 K G S K K A V T K     |                                            |
|              |                  | A25                                              | K5me/K11me3                                   | P E P A Kme S A P A P Kme3 K G S K K A V T K     |                                            |
|              |                  | A26                                              | K5me/K11ac                                    | P E P A Kme S A P A P Kac K G S K K A V T K      |                                            |
|              |                  | A27                                              | K5me2/K11me                                   | P E P A Kme2 S A P A P Kme K G S K K A V T K     |                                            |
|              |                  | A28                                              | K5me2/K11me2                                  | P E P A Kme2 S A P A P Kme2 K G S K K A V T K    |                                            |
|              |                  | A29                                              | K5me2/K11me3                                  | P E P A Kme2 S A P A P Kme3 K G S K K A V T K    |                                            |
|              |                  | A30                                              | K5me2/K11ac                                   | P E P A Kme2 S A P A P Kac K G S K K A V T K     |                                            |
|              |                  | A31                                              | K5me3/K11me                                   | P E P A Kme3 S A P A P Kme K G S K K A V T K     |                                            |
|              |                  | A32                                              | K5me3/K11me2                                  | P E P A Kme3 S A P A P Kme2 K G S K K A V T K    |                                            |
|              |                  | A33                                              | K5me3/K11me3                                  | P E P A Kme3 S A P A P Kme3 K G S K K A V T K    |                                            |
|              |                  | A34                                              | K5me3/K11ac                                   | P E P A Kme3 S A P A P Kac K G S K K A V T K     |                                            |
|              |                  | A35                                              | K5ac/K11me                                    | P E P A Kac S A P A P Kme K G S K K A V T K      |                                            |
|              |                  | A36                                              | K5ac/K11me2                                   | P E P A Kac S A P A P Kme2 K G S K K A V T K     |                                            |
|              |                  | A37                                              | K5ac/K11me3                                   | P E P A Kac S A P A P Kme3 K G S K K A V T K     |                                            |
|              |                  | B1                                               | K5ac/K11ac                                    | P E P A Kac S A P A P Kac K G S K K A V T K      |                                            |
|              |                  | B2                                               | K5me/pS6/K11me                                | P E P A Kme pS S A P A P Kme K G S K K A V T K   |                                            |
|              |                  | B3                                               | K5me/pS6/K11me2                               | P E P A Kme pS S A P A P Kme2 K G S K K A V T K  |                                            |
|              |                  | B4                                               | K5me/pS6/K11me3                               | P E P A Kme pS S A P A P Kme3 K G S K K A V T K  |                                            |
|              |                  | B5                                               | K5me/pS6/K11ac                                | P E P A Kme pS S A P A P Kac K G S K K A V T K   |                                            |
|              |                  | B6                                               | K5me2/pS6/K11me                               | P E P A Kme2 pS S A P A P Kme K G S K K A V T K  |                                            |
|              |                  | B7                                               | K5me2/pS6/K11me2                              | P E P A Kme2 pS S A P A P Kme2 K G S K K A V T K |                                            |
|              |                  | B8                                               | K5me2/pS6/K11me3                              | P E P A Kme2 pS S A P A P Kme3 K G S K K A V T K |                                            |
|              |                  | B9                                               | K5me2/pS6/K11ac                               | P E P A Kme2 pS S A P A P Kac K G S K K A V T K  |                                            |
| B10          | K5me3/pS6/K11me  | P E P A Kme3 pS S A P A P Kme K G S K K A V T K  |                                               |                                                  |                                            |
| B11          | K5me3/pS6/K11me2 | P E P A Kme3 pS S A P A P Kme2 K G S K K A V T K |                                               |                                                  |                                            |
| B12          | K5me3/pS6/K11me3 | P E P A Kme3 pS S A P A P Kme3 K G S K K A V T K |                                               |                                                  |                                            |
| B13          | K5me3/pS6/K11ac  | P E P A Kme3 pS S A P A P Kac K G S K K A V T K  |                                               |                                                  |                                            |
| B14          | K5ac/pS6/K11me   | P E P A Kac pS S A P A P Kme K G S K K A V T K   |                                               |                                                  |                                            |
| B15          | K5ac/pS6/K11me2  | P E P A Kac pS S A P A P Kme2 K G S K K A V T K  |                                               |                                                  |                                            |
| B16          | K5ac/pS6/K11me3  | P E P A Kac pS S A P A P Kme3 K G S K K A V T K  |                                               |                                                  |                                            |
| B17          | K5ac/pS6/K11ac   | P E P A Kac pS S A P A P Kac K G S K K A V T K   |                                               |                                                  |                                            |
| 6-25         | 1-20             | B18                                              | K11me/K12me                                   | P E P A K S A P A P Kme Kme G S K K A V T K      |                                            |
|              |                  | B19                                              | K11me/K12me2                                  | P E P A K S A P A P Kme Kme2 G S K K A V T K     |                                            |
|              |                  | B20                                              | K11me/K12me3                                  | P E P A K S A P A P Kme Kme3 G S K K A V T K     |                                            |
|              |                  | B21                                              | K11me/K12ac                                   | P E P A K S A P A P Kme Kac G S K K A V T K      |                                            |
|              |                  | B22                                              | K11me2/K12me                                  | P E P A K S A P A P Kme2 Kme G S K K A V T K     |                                            |
|              |                  | B23                                              | K11me2/K12me2                                 | P E P A K S A P A P Kme2 Kme2 G S K K A V T K    |                                            |
|              |                  | B24                                              | K11me2/K12me3                                 | P E P A K S A P A P Kme2 Kme3 G S K K A V T K    |                                            |
|              |                  | B25                                              | K11me2/K12ac                                  | P E P A K S A P A P Kme2 Kac G S K K A V T K     |                                            |
|              |                  | B26                                              | K11me3/K12me                                  | P E P A K S A P A P Kme3 Kme G S K K A V T K     |                                            |
|              |                  | B27                                              | K11me3/K12me2                                 | P E P A K S A P A P Kme3 Kme2 G S K K A V T K    |                                            |
|              |                  | B28                                              | K11me3/K12me3                                 | P E P A K S A P A P Kme3 Kme3 G S K K A V T K    |                                            |
|              |                  | B29                                              | K11me3/K12ac                                  | P E P A K S A P A P Kme3 Kac G S K K A V T K     |                                            |
|              |                  | B30                                              | K11ac/K12me                                   | P E P A K S A P A P Kac Kme G S K K A V T K      |                                            |
|              |                  | B31                                              | K11ac/K12me2                                  | P E P A K S A P A P Kac Kme2 G S K K A V T K     |                                            |
|              |                  | B32                                              | K11ac/K12me3                                  | P E P A K S A P A P Kac Kme3 G S K K A V T K     |                                            |
|              |                  | B33                                              | K11ac/K12ac                                   | P E P A K S A P A P Kac Kac G S K K A V T K      |                                            |
|              |                  | B34                                              | K11me/K12me/pS14                              | P E P A K S A P A P Kme Kme G pS K K A V T K     |                                            |
|              |                  | B35                                              | K11me/K12me2/pS14                             | P E P A K S A P A P Kme Kme2 G pS K K A V T K    |                                            |
|              |                  | B36                                              | K11me/K12me3/pS14                             | P E P A K S A P A P Kme Kme3 G pS K K A V T K    |                                            |
|              |                  | B37                                              | K11me/K12ac/pS14                              | P E P A K S A P A P Kme Kac G pS K K A V T K     |                                            |
|              |                  | C1                                               | K11me2/K12me/pS14                             | P E P A K S A P A P Kme2 Kme G pS K K A V T K    |                                            |
|              |                  | C2                                               | K11me2/K12me2/pS14                            | P E P A K S A P A P Kme2 Kme2 G pS K K A V T K   |                                            |
|              |                  | C3                                               | K11me2/K12me3/pS14                            | P E P A K S A P A P Kme2 Kme3 G pS K K A V T K   |                                            |
|              |                  | C4                                               | K11me2/K12ac/pS14                             | P E P A K S A P A P Kme2 Kac G pS K K A V T K    |                                            |
|              |                  | C5                                               | K11me3/K12me/pS14                             | P E P A K S A P A P Kme3 Kme G pS K K A V T K    |                                            |
|              |                  | C6                                               | K11me3/K12me2/pS14                            | P E P A K S A P A P Kme3 Kme2 G pS K K A V T K   |                                            |
|              |                  | C7                                               | K11me3/K12me3/pS14                            | P E P A K S A P A P Kme3 Kme3 G pS K K A V T K   |                                            |
|              |                  | C8                                               | K11me3/K12ac/pS14                             | P E P A K S A P A P Kme3 Kac G pS K K A V T K    |                                            |
|              |                  | C9                                               | K11ac/K12me/pS14                              | P E P A K S A P A P Kac Kme G pS K K A V T K     |                                            |
|              |                  | C10                                              | K11ac/K12me2/pS14                             | P E P A K S A P A P Kac Kme2 G pS K K A V T K    |                                            |
|              |                  | C11                                              | K11ac/K12me3/pS14                             | P E P A K S A P A P Kac Kme3 G pS K K A V T K    |                                            |
|              |                  | C12                                              | K11ac/K12ac/pS14                              | P E P A K S A P A P Kac Kac G pS K K A V T K     |                                            |
|              |                  | C13                                              | blank                                         |                                                  |                                            |
|              |                  | C14                                              | CONTROL                                       |                                                  | S A P A P K K G S K K A V T K A Q K K D    |
|              |                  | C15                                              | K11me                                         |                                                  | S A P A P Kme K G S K K A V T K A Q K K D  |
|              |                  | C16                                              | K11me2                                        |                                                  | S A P A P Kme2 K G S K K A V T K A Q K K D |
|              |                  | C17                                              | K11me3                                        |                                                  | S A P A P Kme3 K G S K K A V T K A Q K K D |
| C18          | K11ac            |                                                  | S A P A P Kac K G S K K A V T K A Q K K D     |                                                  |                                            |
| C19          | K12me            |                                                  | S A P A P K Kme G S K K A V T K A Q K K D     |                                                  |                                            |
| C20          | K12me2           |                                                  | S A P A P K Kme2 G S K K A V T K A Q K K D    |                                                  |                                            |
| C21          | K12me3           |                                                  | S A P A P K Kme3 G S K K A V T K A Q K K D    |                                                  |                                            |
| C22          | K12ac            |                                                  | S A P A P K Kac G S K K A V T K A Q K K D     |                                                  |                                            |
| C23          | pS14             |                                                  | S A P A P K K G pS K K A V T K A Q K K D      |                                                  |                                            |
| C24          | K15me            |                                                  | S A P A P K K G S Kme K A V T K A Q K K D     |                                                  |                                            |
| C25          | K15me2           |                                                  | S A P A P K K G S Kme2 K A V T K A Q K K D    |                                                  |                                            |
| C26          | K15me3           |                                                  | S A P A P K K G S Kme3 K A V T K A Q K K D    |                                                  |                                            |
| C27          | K15ac            |                                                  | S A P A P K K G S Kac K A V T K A Q K K D     |                                                  |                                            |
| C28          | K16me            |                                                  | S A P A P K K G S K Kme A V T K A Q K K D     |                                                  |                                            |
| C29          | K16me2           |                                                  | S A P A P K K G S K Kme2 A V T K A Q K K D    |                                                  |                                            |
| C30          | K16me3           |                                                  | S A P A P K K G S K Kme3 A V T K A Q K K D    |                                                  |                                            |
| C31          | K16ac            |                                                  | S A P A P K K G S K Kac A V T K A Q K K D     |                                                  |                                            |
| C32          | pT19             |                                                  | S A P A P K K G S K K A V pT K A Q K K D      |                                                  |                                            |
| C33          | K11me/K12me      |                                                  | S A P A P Kme Kme G S K K A V T K A Q K K D   |                                                  |                                            |
| C34          | K11me/K12me2     |                                                  | S A P A P Kme Kme2 G S K K A V T K A Q K K D  |                                                  |                                            |
| C35          | K11me/K12me3     |                                                  | S A P A P Kme Kme3 G S K K A V T K A Q K K D  |                                                  |                                            |
| C36          | K11me/K12ac      |                                                  | S A P A P Kme Kac G S K K A V T K A Q K K D   |                                                  |                                            |
| C37          | K11me2/K12me     |                                                  | S A P A P Kme2 Kme G S K K A V T K A Q K K D  |                                                  |                                            |
| D1           | K11me2/K12me2    |                                                  | S A P A P Kme2 Kme2 G S K K A V T K A Q K K D |                                                  |                                            |









|     |             |   |   |   |   |   |   |    |   |      |   |    |   |    |   |   |   |   |   |   |   |
|-----|-------------|---|---|---|---|---|---|----|---|------|---|----|---|----|---|---|---|---|---|---|---|
| M14 | CONTROL     | G | K | K | R | K | R | S  | R | K    | E | S  | Y | S  | V | Y | V | Y | K | V | L |
| M16 | pS32        | G | K | K | R | K | R | pS | R | K    | E | S  | Y | S  | V | Y | V | Y | K | V | L |
| M17 | K34me       | G | K | K | R | K | R | S  | R | Kme  | E | S  | Y | S  | V | Y | V | Y | K | V | L |
| M18 | K34me2      | G | K | K | R | K | R | S  | R | Kme2 | E | S  | Y | S  | V | Y | V | Y | K | V | L |
| M19 | K34me3      | G | K | K | R | K | R | S  | R | Kme3 | E | S  | Y | S  | V | Y | V | Y | K | V | L |
| M20 | K34ac       | G | K | K | R | K | R | S  | R | Kac  | E | S  | Y | S  | V | Y | V | Y | K | V | L |
| M21 | pS36        | G | K | K | R | K | R | S  | R | K    | E | pS | Y | S  | V | Y | V | Y | K | V | L |
| M22 | pS38        | G | K | K | R | K | R | S  | R | K    | E | S  | Y | pS | V | Y | V | Y | K | V | L |
| M23 | pS32/K34me  | G | K | K | R | K | R | pS | R | Kme  | E | S  | Y | S  | V | Y | V | Y | K | V | L |
| M24 | pS32/K34me2 | G | K | K | R | K | R | pS | R | Kme2 | E | S  | Y | S  | V | Y | V | Y | K | V | L |
| M25 | pS32/K34me3 | G | K | K | R | K | R | pS | R | Kme3 | E | S  | Y | S  | V | Y | V | Y | K | V | L |
| M26 | pS32/K34ac  | G | K | K | R | K | R | pS | R | Kac  | E | S  | Y | S  | V | Y | V | Y | K | V | L |
| M27 | K34me/pS36  | G | K | K | R | K | R | S  | R | Kme  | E | pS | Y | S  | V | Y | V | Y | K | V | L |
| M28 | K34me2/pS36 | G | K | K | R | K | R | S  | R | Kme2 | E | pS | Y | S  | V | Y | V | Y | K | V | L |
| M29 | K34me3/pS36 | G | K | K | R | K | R | S  | R | Kme3 | E | pS | Y | S  | V | Y | V | Y | K | V | L |
| M30 | K34ac/pS36  | G | K | K | R | K | R | S  | R | Kac  | E | pS | Y | S  | V | Y | V | Y | K | V | L |
| M31 | K34me/pS38  | G | K | K | R | K | R | S  | R | Kme  | E | S  | Y | pS | V | Y | V | Y | K | V | L |
| M32 | K34me2/pS38 | G | K | K | R | K | R | S  | R | Kme2 | E | S  | Y | pS | V | Y | V | Y | K | V | L |
| M33 | K34me3/pS38 | G | K | K | R | K | R | S  | R | Kme3 | E | S  | Y | pS | V | Y | V | Y | K | V | L |
| M34 | K34ac/pS38  | G | K | K | R | K | R | S  | R | Kac  | E | S  | Y | pS | V | Y | V | Y | K | V | L |

| Histone       | Peptide Length    | Array Poition                                 | Kac Mark Combinations | Sequence                                         |         |                                            |
|---------------|-------------------|-----------------------------------------------|-----------------------|--------------------------------------------------|---------|--------------------------------------------|
| polyHis CTRL  |                   | A1                                            | HHHHHHHHHH            |                                                  |         |                                            |
| polyHis CTRL  |                   | A2                                            | HHHHHHHHHH            |                                                  |         |                                            |
|               |                   | A3                                            | (blank)               |                                                  |         |                                            |
| H3.1 (P68431) | 1-20              | A4                                            | CONTROL               | A R T K Q T A R K S T G G K A P R K Q L          |         |                                            |
|               |                   | A5                                            | K4me                  | A R T Kme Q T A R K S T G G K A P R K Q L        |         |                                            |
|               |                   | A6                                            | K4me2                 | A R T Kme2 Q T A R K S T G G K A P R K Q L       |         |                                            |
|               |                   | A7                                            | K4me3                 | A R T Kme3 Q T A R K S T G G K A P R K Q L       |         |                                            |
|               |                   | A8                                            | K4ac                  | A R T Kac Q T A R K S T G G K A P R K Q L        |         |                                            |
|               |                   | A9                                            | pT3                   | A R pT K Q T A R K S T G G K A P R K Q L         |         |                                            |
|               |                   | A10                                           | pT3/K4ac              | A R pT Kme Q T A R K S T G G K A P R K Q L       |         |                                            |
|               |                   | A11                                           | pT3/K4me              | A R pT Kme2 Q T A R K S T G G K A P R K Q L      |         |                                            |
|               |                   | A12                                           | pT3/K4me2             | A R pT Kme3 Q T A R K S T G G K A P R K Q L      |         |                                            |
|               |                   | A13                                           | pT3/K4me3             | A R pT Kac Q T A R K S T G G K A P R K Q L       |         |                                            |
|               |                   | A14                                           | pT6                   | A R T K Q pT A R K S T G G K A P R K Q L         |         |                                            |
|               |                   | A15                                           | K4me/pT6              | A R T Kme Q pT A R K S T G G K A P R K Q L       |         |                                            |
|               |                   | A16                                           | K4me2/pT6             | A R T Kme2 Q pT A R K S T G G K A P R K Q L      |         |                                            |
|               |                   | A17                                           | K4me3/pT6             | A R T Kme3 Q pT A R K S T G G K A P R K Q L      |         |                                            |
|               |                   | A18                                           | K4ac/pT6              | A R T Kac Q pT A R K S T G G K A P R K Q L       |         |                                            |
|               |                   | B1                                            | K9me                  | A R T K Q T A R Kme S T G G K A P R K Q L        |         |                                            |
|               |                   | B2                                            | K9me2                 | A R T K Q T A R Kme2 S T G G K A P R K Q L       |         |                                            |
|               |                   | B3                                            | K9me3                 | A R T K Q T A R Kme3 S T G G K A P R K Q L       |         |                                            |
|               |                   | B4                                            | K9ac                  | A R T K Q T A R Kac S T G G K A P R K Q L        |         |                                            |
|               |                   | B5                                            | pT6/K9me              | A R T K Q pT A R Kme S T G G K A P R K Q L       |         |                                            |
|               |                   | B6                                            | pT6/K9me2             | A R T K Q pT A R Kme2 S T G G K A P R K Q L      |         |                                            |
|               |                   | B7                                            | pT6/K9me3             | A R T K Q pT A R Kme3 S T G G K A P R K Q L      |         |                                            |
|               |                   | B8                                            | pT6/K9ac              | A R T K Q pT A R Kac S T G G K A P R K Q L       |         |                                            |
|               |                   | B9                                            | pS10                  | A R T K Q T A R K pS T G G K A P R K Q L         |         |                                            |
|               |                   | B10                                           | K9me/pS10             | A R T K Q T A R Kme pS T G G K A P R K Q L       |         |                                            |
|               |                   | B11                                           | K9me2/pS10            | A R T K Q T A R Kme2 pS T G G K A P R K Q L      |         |                                            |
|               |                   | B12                                           | K9me3/pS10            | A R T K Q T A R Kme3 pS T G G K A P R K Q L      |         |                                            |
|               |                   | B13                                           | K9ac/pS10             | A R T K Q T A R Kac pS T G G K A P R K Q L       |         |                                            |
|               |                   | B14                                           | pT11                  | A R T K Q T A R K S pT G G K A P R K Q L         |         |                                            |
|               |                   | B15                                           | K9me/pT11             | A R T K Q T A R Kme S pT G G K A P R K Q L       |         |                                            |
|               |                   | B16                                           | K9me2/pT11            | A R T K Q T A R Kme2 S pT G G K A P R K Q L      |         |                                            |
|               |                   | B17                                           | K9me3/pT11            | A R T K Q T A R Kme3 S pT G G K A P R K Q L      |         |                                            |
|               |                   | B18                                           | K9ac/pT11             | A R T K Q T A R Kac S pT G G K A P R K Q L       |         |                                            |
|               |                   | C1                                            | K14me                 | A R T K Q T A R K S T G G Kme A P R K Q L        |         |                                            |
|               |                   | C2                                            | K14me2                | A R T K Q T A R K S T G G Kme2 A P R K Q L       |         |                                            |
|               |                   | C3                                            | K14me3                | A R T K Q T A R K S T G G Kme3 A P R K Q L       |         |                                            |
|               |                   | C4                                            | K14ac                 | A R T K Q T A R K S T G G Kac A P R K Q L        |         |                                            |
|               |                   | C5                                            | K9me/K14ac            | A R T K Q T A R Kme Kac S T G G Kac A P R K Q L  |         |                                            |
|               |                   | C6                                            | K9me2/K14ac           | A R T K Q T A R Kme2 Kac S T G G Kac A P R K Q L |         |                                            |
|               |                   | C7                                            | K9me3/K14ac           | A R T K Q T A R Kme3 Kac S T G G Kac A P R K Q L |         |                                            |
|               |                   | C8                                            | K9ac/K14ac            | A R T K Q T A R Kac Kac S T G G Kac A P R K Q L  |         |                                            |
|               |                   | C9                                            | pS10/K14ac            | A R T K Q T A R K pS T G G Kac A P R K Q L       |         |                                            |
|               |                   | C10                                           | pT11/K14ac            | A R T K Q T A R K S pT G G Kac A P R K Q L       |         |                                            |
|               |                   | C11                                           | K9ac/pS10/K14ac       | A R T K Q T A R Kac pS T G G Kac A P R K Q L     |         |                                            |
|               |                   | C12                                           | K9ac/pT11/K14ac       | A R T K Q T A R Kac S pT G G Kac A P R K Q L     |         |                                            |
|               |                   | H3.1 (P68431)                                 | 6-25                  | C13                                              | CONTROL | T A R K S T G G K A P R K Q L A T K A A    |
|               |                   |                                               |                       | C14                                              | K14me   | T A R K S T G G Kme A P R K Q L A T K A A  |
|               |                   |                                               |                       | C15                                              | K14me2  | T A R K S T G G Kme2 A P R K Q L A T K A A |
| C16           | K14me3            |                                               |                       | T A R K S T G G Kme3 A P R K Q L A T K A A       |         |                                            |
| C17           | K14ac             |                                               |                       | T A R K S T G G Kac A P R K Q L A T K A A        |         |                                            |
| C18           | K9me/K14ac        |                                               |                       | T A R Kme S T G G Kac A P R K Q L A T K A A      |         |                                            |
| D1            | K9me2/K14ac       |                                               |                       | T A R Kme2 S T G G Kac A P R K Q L A T K A A     |         |                                            |
| D2            | K9me3/K14ac       |                                               |                       | T A R Kme3 S T G G Kac A P R K Q L A T K A A     |         |                                            |
| D3            | K9ac/K14ac        |                                               |                       | T A R Kac S T G G Kac A P R K Q L A T K A A      |         |                                            |
| D4            | pS10/K14ac        |                                               |                       | T A R K pS T G G K A P R K Q L A T K A A         |         |                                            |
| D5            | pT11/K14ac        |                                               |                       | T A R K S pT G G K A P R K Q L A T K A A         |         |                                            |
| D6            | K9ac/pS10/K14ac   |                                               |                       | T A R Kac pS T G G Kac A P R K Q L A T K A A     |         |                                            |
| D7            | K9ac/pT11/K14ac   |                                               |                       | T A R Kac S pT G G Kac A P R K Q L A T K A A     |         |                                            |
| D8            | K18me             |                                               |                       | T A R K S T G G K A P R Kme Q L A T K A A        |         |                                            |
| D9            | K18me2            |                                               |                       | T A R K S T G G K A P R Kme2 Q L A T K A A       |         |                                            |
| D10           | K18me3            |                                               |                       | T A R K S T G G K A P R Kme3 Q L A T K A A       |         |                                            |
| D11           | K18ac             |                                               |                       | T A R K S T G G K A P R Kac Q L A T K A A        |         |                                            |
| D12           | K14ac/K18me       |                                               |                       | T A R K S T G G Kac A P R Kme Q L A T K A A      |         |                                            |
| D13           | K14ac/K18me2      |                                               |                       | T A R K S T G G Kac A P R Kme2 Q L A T K A A     |         |                                            |
| D14           | K14ac/K18me3      |                                               |                       | T A R K S T G G Kac A P R Kme3 Q L A T K A A     |         |                                            |
| D15           | K14ac/K18ac       |                                               |                       | T A R K S T G G Kac A P R Kac Q L A T K A A      |         |                                            |
| D16           | pS10/K14ac/K18me  |                                               |                       | T A R K pS T G G Kac A P R Kme Q L A T K A A     |         |                                            |
| D17           | pS10/K14ac/K18me2 |                                               |                       | T A R K pS T G G Kac A P R Kme2 Q L A T K A A    |         |                                            |
| D18           | pS10/K14ac/K18me3 | T A R K pS T G G Kac A P R Kme3 Q L A T K A A |                       |                                                  |         |                                            |
| E1            | pS10/K14ac/K18ac  | T A R K pS T G G Kac A P R Kac Q L A T K A A  |                       |                                                  |         |                                            |
| E2            | pT11/K14ac/K18me  | T A R K S pT G G Kac A P R Kme Q L A T K A A  |                       |                                                  |         |                                            |
| E3            | pT11/K14ac/K18me2 | T A R K S pT G G Kac A P R Kme2 Q L A T K A A |                       |                                                  |         |                                            |
| E4            | pT11/K14ac/K18me3 | T A R K S pT G G Kac A P R Kme3 Q L A T K A A |                       |                                                  |         |                                            |
| E5            | pT11/K14ac/K18ac  | T A R K S pT G G Kac A P R Kac Q L A T K A A  |                       |                                                  |         |                                            |
| H3.1 (P68431) | 11-30             | E6                                            | CONTROL               | T G G K A P R K Q L A T K A A R K S A P          |         |                                            |
|               |                   | E7                                            | K18me                 | T G G K A P R Kme Q L A T K A A R K S A P        |         |                                            |
|               |                   | E8                                            | K18me2                | T G G K A P R Kme2 Q L A T K A A R K S A P       |         |                                            |
|               |                   | E9                                            | K18me3                | T G G K A P R Kme3 Q L A T K A A R K S A P       |         |                                            |
|               |                   | E10                                           | K18ac                 | T G G K A P R Kac Q L A T K A A R K S A P        |         |                                            |
|               |                   | E11                                           | K14ac/K18me           | T G G Kac A P R Kme Q L A T K A A R K S A P      |         |                                            |
|               |                   | E12                                           | K14ac/K18me2          | T G G Kac A P R Kme2 Q L A T K A A R K S A P     |         |                                            |
|               |                   | E13                                           | K14ac/K18me3          | T G G Kac A P R Kme3 Q L A T K A A R K S A P     |         |                                            |
|               |                   | E14                                           | K14ac/K18ac           | T G G Kac A P R Kac Q L A T K A A R K S A P      |         |                                            |
|               |                   | E15                                           | pT22                  | T G G K A P R K Q L A T K A A R K S A P          |         |                                            |
|               |                   | E16                                           | pT22/K18me            | T G G K A P R Kme Q L A T K A A R K S A P        |         |                                            |
|               |                   | E17                                           | pT22/K18me2           | T G G K A P R Kme2 Q L A T K A A R K S A P       |         |                                            |
|               |                   | E18                                           | pT22/K18me3           | T G G K A P R Kme3 Q L A T K A A R K S A P       |         |                                            |
|               |                   | F1                                            | pT22/K18ac            | T G G K A P R Kac Q L A T K A A R K S A P        |         |                                            |
|               |                   | F2                                            | K23me                 | T G G K A P R K Q L A T Kme A A R K S A P        |         |                                            |
|               |                   | F3                                            | K23me2                | T G G K A P R K Q L A T Kme2 A A R K S A P       |         |                                            |
|               |                   | F4                                            | K23me3                | T G G K A P R K Q L A T Kme3 A A R K S A P       |         |                                            |
|               |                   | F5                                            | K23ac                 | T G G K A P R K Q L A T Kac A A R K S A P        |         |                                            |
| F6            | pT22/K23me        | T G G K A P R K Q L A T Kme pT A A R K S A P  |                       |                                                  |         |                                            |





















| Histone      | Peptide Length | Array Poition | Kac Mark Combinations | Sequence                                   |
|--------------|----------------|---------------|-----------------------|--------------------------------------------|
| polyHis CTRL |                | A1            | HHHHHHHH              |                                            |
| polyHis CTRL |                | A2            | HHHHHHHH              |                                            |
|              |                | A3            | Blank                 |                                            |
| H4 (P62805)  | 1-20           | A4            | CONTROL               | S G R G K G G K G L G K G G A K R H R K    |
|              |                | A5            | pS1                   | pS G R G K G G K G L G K G G A K R H R K   |
|              |                | A6            | K5me                  | S G R G X1 G G K G L G K G G A K R H R K   |
|              |                | A7            | K5me2                 | S G R G X2 G G K G L G K G G A K R H R K   |
|              |                | A8            | K5me3                 | S G R G X3 G G K G L G K G G A K R H R K   |
|              |                | A9            | K5ac                  | S G R G X4 G G K G L G K G G A K R H R K   |
|              |                | A10           | K8me                  | S G R G K G G X1 G L G K G G A K R H R K   |
|              |                | A11           | K8me2                 | S G R G K G G X2 G L G K G G A K R H R K   |
|              |                | A12           | K8me3                 | S G R G K G G X3 G L G K G G A K R H R K   |
|              |                | A13           | K8ac                  | S G R G K G G X4 G L G K G G A K R H R K   |
|              |                | A14           | K12me                 | S G R G K G G K G L G X1 G G A K R H R K   |
|              |                | A15           | K12me2                | S G R G K G G K G L G X2 G G A K R H R K   |
|              |                | A16           | K12me3                | S G R G K G G K G L G X3 G G A K R H R K   |
|              |                | A17           | K12ac                 | S G R G K G G K G L G X4 G G A K R H R K   |
|              |                | A18           | pS1/K5me              | pS G R G X1 G G K G L G K G G A K R H R K  |
|              |                | A19           | pS1/K5me2             | pS G R G X2 G G K G L G K G G A K R H R K  |
|              |                | A20           | pS1/K5me3             | pS G R G X3 G G K G L G K G G A K R H R K  |
|              |                | A21           | pS1/K5ac              | pS G R G X4 G G K G L G K G G A K R H R K  |
|              |                | A22           | pS1/K8me              | pS G R G K G G X1 G L G K G G A K R H R K  |
|              |                | A23           | pS1/K8me2             | pS G R G K G G X2 G L G K G G A K R H R K  |
|              |                | A24           | pS1/K8me3             | pS G R G K G G X3 G L G K G G A K R H R K  |
|              |                | A25           | pS1/K8ac              | pS G R G K G G X4 G L G K G G A K R H R K  |
|              |                | A26           | K5me/K8me             | S G R G X1 G G X1 G L G K G G A K R H R K  |
|              |                | A27           | K5me/K8me2            | S G R G X1 G G X2 G L G K G G A K R H R K  |
|              |                | A28           | K5me/K8me3            | S G R G X1 G G X3 G L G K G G A K R H R K  |
|              |                | A29           | K5me/K8ac             | S G R G X1 G G X4 G L G K G G A K R H R K  |
|              |                | A30           | K5me2/K8me            | S G R G X2 G G X1 G L G K G G A K R H R K  |
|              |                | A31           | K5me2/K8me2           | S G R G X2 G G X2 G L G K G G A K R H R K  |
|              |                | A32           | K5me2/K8me3           | S G R G X2 G G X3 G L G K G G A K R H R K  |
|              |                | A33           | K5me2/K8ac            | S G R G X2 G G X4 G L G K G G A K R H R K  |
|              |                | A34           | K5me3/K8me            | S G R G X3 G G X1 G L G K G G A K R H R K  |
|              |                | A35           | K5me3/K8me2           | S G R G X3 G G X2 G L G K G G A K R H R K  |
|              |                | A36           | K5me3/K8me3           | S G R G X3 G G X3 G L G K G G A K R H R K  |
|              |                | A37           | K5me3/K8ac            | S G R G X3 G G X4 G L G K G G A K R H R K  |
|              |                | B1            | K5ac/K8me             | S G R G X4 G G X1 G L G K G G A K R H R K  |
|              |                | B2            | K5ac/K8me2            | S G R G X4 G G X2 G L G K G G A K R H R K  |
|              |                | B3            | K5ac/K8me3            | S G R G X4 G G X3 G L G K G G A K R H R K  |
|              |                | B4            | K5ac/K8ac             | S G R G X4 G G X4 G L G K G G A K R H R K  |
|              |                | B5            | K8me/K12me            | S G R G K G G X1 G L G X1 G G A K R H R K  |
|              |                | B6            | K8me/K12me2           | S G R G K G G X1 G L G X2 G G A K R H R K  |
|              |                | B7            | K8me/K12me3           | S G R G K G G X1 G L G X3 G G A K R H R K  |
|              |                | B8            | K8me/K12ac            | S G R G K G G X1 G L G X4 G G A K R H R K  |
|              |                | B9            | K8me2/K12me           | S G R G K G G X2 G L G X1 G G A K R H R K  |
|              |                | B10           | K8me2/K12me2          | S G R G K G G X2 G L G X2 G G A K R H R K  |
|              |                | B11           | K8me2/K12me3          | S G R G K G G X2 G L G X3 G G A K R H R K  |
|              |                | B12           | K8me2/K12ac           | S G R G K G G X2 G L G X4 G G A K R H R K  |
|              |                | B13           | K8me3/K12me           | S G R G K G G X3 G L G X1 G G A K R H R K  |
|              |                | B14           | K8me3/K12me2          | S G R G K G G X3 G L G X2 G G A K R H R K  |
|              |                | B15           | K8me3/K12me3          | S G R G K G G X3 G L G X3 G G A K R H R K  |
|              |                | B16           | K8me3/K12ac           | S G R G K G G X3 G L G X4 G G A K R H R K  |
|              |                | B17           | K8ac/K12me            | S G R G K G G X4 G L G X1 G G A K R H R K  |
|              |                | B18           | K8ac/K12me2           | S G R G K G G X4 G L G X2 G G A K R H R K  |
|              |                | B19           | K8ac/K12me3           | S G R G K G G X4 G L G X3 G G A K R H R K  |
|              |                | B20           | K8ac/K12ac            | S G R G K G G X4 G L G X4 G G A K R H R K  |
|              |                | B21           | pS1/K5me/K8me         | pS G R G X1 G G X1 G L G K G G A K R H R K |
|              |                | B22           | pS1/K5me/K8me2        | pS G R G X1 G G X2 G L G K G G A K R H R K |
|              |                | B23           | pS1/K5me/K8me3        | pS G R G X1 G G X3 G L G K G G A K R H R K |
|              |                | B24           | pS1/K5me/K8ac         | pS G R G X1 G G X4 G L G K G G A K R H R K |
|              |                | B25           | pS1/K5me2/K8me        | pS G R G X2 G G X1 G L G K G G A K R H R K |
|              |                | B26           | pS1/K5me2/K8me2       | pS G R G X2 G G X2 G L G K G G A K R H R K |
|              |                | B27           | pS1/K5me2/K8me3       | pS G R G X2 G G X3 G L G K G G A K R H R K |
|              |                | B28           | pS1/K5me2/K8ac        | pS G R G X2 G G X4 G L G K G G A K R H R K |
|              |                | B29           | pS1/K5me3/K8me        | pS G R G X3 G G X1 G L G K G G A K R H R K |
|              |                | B30           | pS1/K5me3/K8me2       | pS G R G X3 G G X2 G L G K G G A K R H R K |
|              |                | B31           | pS1/K5me3/K8me3       | pS G R G X3 G G X3 G L G K G G A K R H R K |
|              |                | B32           | pS1/K5me3/K8ac        | pS G R G X3 G G X4 G L G K G G A K R H R K |
|              |                | B33           | pS1/K5ac/K8me         | pS G R G X4 G G X1 G L G K G G A K R H R K |
|              |                | B34           | pS1/K5ac/K8me2        | pS G R G X4 G G X2 G L G K G G A K R H R K |
|              |                | B35           | pS1/K5ac/K8me3        | pS G R G X4 G G X3 G L G K G G A K R H R K |
|              |                | B36           | pS1/K5ac/K8ac         | pS G R G X4 G G X4 G L G K G G A K R H R K |
|              |                | B37           | K5ac/K8ac/K12ac       | S G R G X4 G G X4 G L G X4 G G A K R H R K |
|              |                | C1            | CONTROL               | G G K G L G K G G A K R H R K V L R D N    |
|              |                | C2            | K12me                 | G G K G L G X1 G G A K R H R K V L R D N   |
|              |                | C3            | K12me2                | G G K G L G X2 G G A K R H R K V L R D N   |
|              |                | C4            | K12me3                | G G K G L G X3 G G A K R H R K V L R D N   |
|              |                | C5            | K12ac                 | G G K G L G X4 G G A K R H R K V L R D N   |
|              |                | C6            | K16me                 | G G K G L G K G G A X1 R H R K V L R D N   |
|              |                | C7            | K16me2                | G G K G L G K G G A X2 R H R K V L R D N   |
|              |                | C8            | K16me3                | G G K G L G K G G A X3 R H R K V L R D N   |
|              |                | C9            | K16ac                 | G G K G L G K G G A X4 R H R K V L R D N   |
|              |                | C10           | K20me                 | G G K G L G K G G A K R H R X1 V L R D N   |
|              |                | C11           | K20me2                | G G K G L G K G G A K R H R X2 V L R D N   |
|              |                | C12           | K20me3                | G G K G L G K G G A K R H R X3 V L R D N   |
|              |                | C13           | K20ac                 | G G K G L G K G G A K R H R X4 V L R D N   |
|              |                | C14           | K12me/K16me           | G G K G L G X1 G G A X1 R H R K V L R D N  |
|              |                | C15           | K12me/K16me2          | G G K G L G X1 G G A X2 R H R K V L R D N  |
|              |                | C16           | K12me/K16me3          | G G K G L G X1 G G A X3 R H R K V L R D N  |
|              |                | C17           | K12me/K16ac           | G G K G L G X1 G G A X4 R H R K V L R D N  |
|              |                | C18           | K12me2/K16me          | G G K G L G X2 G G A X1 R H R K V L R D N  |
|              |                | C19           | K12me2/K16me2         | G G K G L G X2 G G A X2 R H R K V L R D N  |
|              |                | C20           | K12me2/K16me3         | G G K G L G X2 G G A X3 R H R K V L R D N  |
|              |                | C21           | K12me2/K16ac          | G G K G L G X2 G G A X4 R H R K V L R D N  |
|              |                | C22           | K12me3/K16me          | G G K G L G X3 G G A X1 R H R K V L R D N  |
|              |                | C23           | K12me3/K16me2         | G G K G L G X3 G G A X2 R H R K V L R D N  |
|              |                | C24           | K12me3/K16me3         | G G K G L G X3 G G A X3 R H R K V L R D N  |

|     |                   |                                             |
|-----|-------------------|---------------------------------------------|
| C26 | K12me3/K16ac      | G G K G L G X3 G G A X4 R H R K V L R D N   |
| C27 | K12ac/K16me       | G G K G L G X4 G G A X1 R H R K V L R D N   |
| C28 | K12ac/K16me2      | G G K G L G X4 G G A X2 R H R K V L R D N   |
| C29 | K12ac/K16me3      | G G K G L G X4 G G A X3 R H R K V L R D N   |
| C30 | K12ac/K16ac       | G G K G L G X4 G G A X4 R H R K V L R D N   |
| C31 | K16me/K20me       | G G K G L G K G G A X1 R H R X1 V L R D N   |
| C32 | K16me/K20me2      | G G K G L G K G G A X1 R H R X2 V L R D N   |
| C33 | K16me/K20me3      | G G K G L G K G G A X1 R H R X3 V L R D N   |
| C34 | K16me/K20ac       | G G K G L G K G G A X1 R H R X4 V L R D N   |
| C35 | K16me2/K20me      | G G K G L G K G G A X2 R H R X1 V L R D N   |
| C36 | K16me2/K20me2     | G G K G L G K G G A X2 R H R X2 V L R D N   |
| C37 | K16me2/K20me3     | G G K G L G K G G A X2 R H R X3 V L R D N   |
| D1  | K16me2/K20ac      | G G K G L G K G G A X2 R H R X4 V L R D N   |
| D2  | K16me3/K20me      | G G K G L G K G G A X3 R H R X1 V L R D N   |
| D3  | K16me3/K20me2     | G G K G L G K G G A X3 R H R X2 V L R D N   |
| D4  | K16me3/K20me3     | G G K G L G K G G A X3 R H R X3 V L R D N   |
| D5  | K16me3/K20ac      | G G K G L G K G G A X3 R H R X4 V L R D N   |
| D6  | K16ac/K20me       | G G K G L G K G G A X4 R H R X1 V L R D N   |
| D7  | K16ac/K20me2      | G G K G L G K G G A X4 R H R X2 V L R D N   |
| D8  | K16ac/K20me3      | G G K G L G K G G A X4 R H R X3 V L R D N   |
| D9  | K16ac/K20ac       | G G K G L G K G G A X4 R H R X4 V L R D N   |
| D10 | K12ac/K16ac/K20ac | G G K G L G X4 G G A X4 R H R X4 V L R D N  |
| D11 |                   |                                             |
| D12 | CONTROL           | G K G G A K R H R K V L R D N I Q G I T     |
| D13 | K16me             | G K G G A X1 R H R K V L R D N I Q G I T    |
| D14 | K16me2            | G K G G A X2 R H R K V L R D N I Q G I T    |
| D15 | K16me3            | G K G G A X3 R H R K V L R D N I Q G I T    |
| D16 | K16ac             | G K G G A X4 R H R K V L R D N I Q G I T    |
| D17 | K20me             | G K G G A K R H R X1 V L R D N I Q G I T    |
| D18 | K20me2            | G K G G A K R H R X2 V L R D N I Q G I T    |
| D19 | K20me3            | G K G G A K R H R X3 V L R D N I Q G I T    |
| D20 | K20ac             | G K G G A K R H R X4 V L R D N I Q G I T    |
| D21 | K16me/K20me       | G K G G A X1 R H R X1 V L R D N I Q G I T   |
| D22 | K16me/K20me2      | G K G G A X1 R H R X2 V L R D N I Q G I T   |
| D23 | K16me/K20me3      | G K G G A X1 R H R X3 V L R D N I Q G I T   |
| D24 | K16me/K20ac       | G K G G A X1 R H R X4 V L R D N I Q G I T   |
| D25 | K16me2/K20me      | G K G G A X2 R H R X1 V L R D N I Q G I T   |
| D26 | K16me2/K20me2     | G K G G A X2 R H R X2 V L R D N I Q G I T   |
| D27 | K16me2/K20me3     | G K G G A X2 R H R X3 V L R D N I Q G I T   |
| D28 | K16me2/K20ac      | G K G G A X2 R H R X4 V L R D N I Q G I T   |
| D29 | K16me3/K20me      | G K G G A X3 R H R X1 V L R D N I Q G I T   |
| D30 | K16me3/K20me2     | G K G G A X3 R H R X2 V L R D N I Q G I T   |
| D31 | K16me3/K20me3     | G K G G A X3 R H R X3 V L R D N I Q G I T   |
| D32 | K16me3/K20ac      | G K G G A X3 R H R X4 V L R D N I Q G I T   |
| D33 | K16ac/K20me       | G K G G A X4 R H R X1 V L R D N I Q G I T   |
| D34 | K16ac/K20me2      | G K G G A X4 R H R X2 V L R D N I Q G I T   |
| D35 | K16ac/K20me3      | G K G G A X4 R H R X3 V L R D N I Q G I T   |
| D36 | K16ac/K20ac       | G K G G A X4 R H R X4 V L R D N I Q G I T   |
| D37 |                   |                                             |
| E1  | CONTROL           | K R H R K V L R D N I Q G I T K P A O R     |
| E2  | K20me             | K R H R X1 V L R D N I Q G I T K P A O R    |
| E3  | K20me2            | K R H R X2 V L R D N I Q G I T K P A O R    |
| E4  | K20me3            | K R H R X3 V L R D N I Q G I T K P A O R    |
| E5  | K20ac             | K R H R X4 V L R D N I Q G I T K P A O R    |
| E6  |                   |                                             |
| E7  | CONTROL           | V L R D N I Q G I T K P A O R E L A R R     |
| E8  | pT30              | V L R D N I Q G I T pT K P A O R E L A R R  |
| E9  | K31me             | V L R D N I Q G I T X1 P A O R E L A R R    |
| E10 | K31me2            | V L R D N I Q G I T X2 P A O R E L A R R    |
| E11 | K31me3            | V L R D N I Q G I T X3 P A O R E L A R R    |
| E12 | K31ac             | V L R D N I Q G I T X4 P A O R E L A R R    |
| E13 | pT30/K31me        | V L R D N I Q G I T pT X1 P A O R E L A R R |
| E14 | pT30/K31me2       | V L R D N I Q G I T pT X2 P A O R E L A R R |
| E15 | pT30/K31me3       | V L R D N I Q G I T pT X3 P A O R E L A R R |
| E16 | pT30/K31ac        | V L R D N I Q G I T pT X4 P A O R E L A R R |
